# Supplementary material
Source: ML conference proceedings conference paper supplement (https://openreview.net/forum?id=FUtMxDTJ_h)

Deviation from True Trajectory

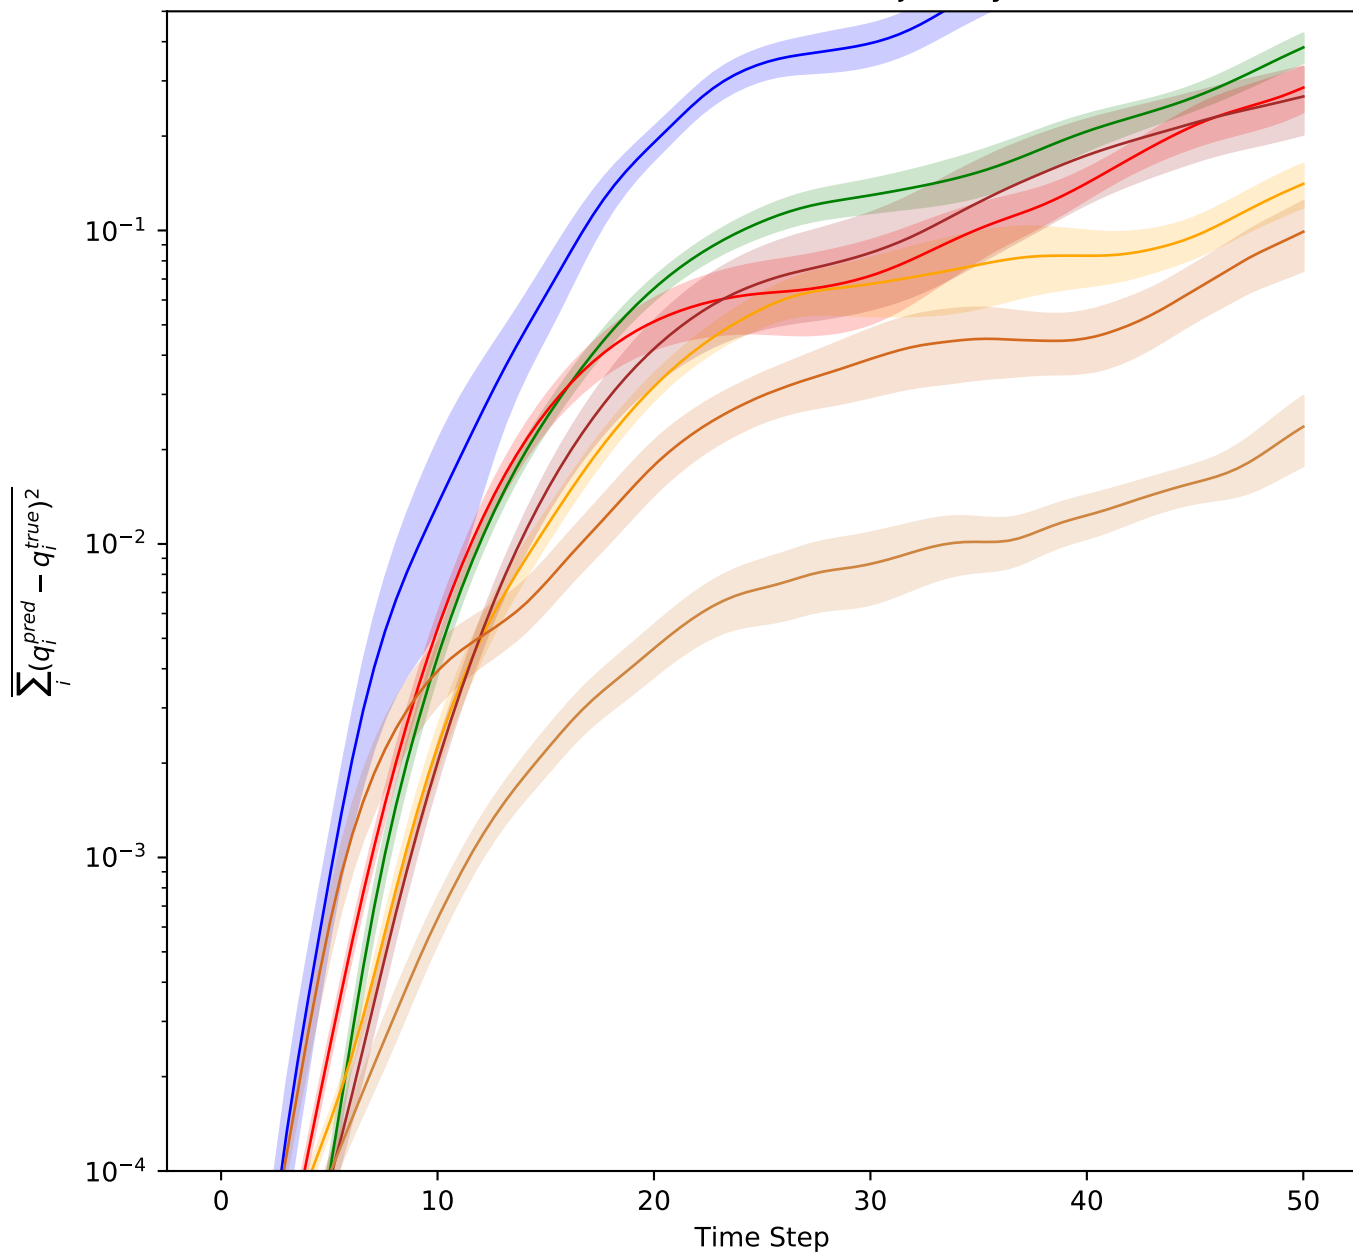

Supplement: supplementary_material [file attachment]

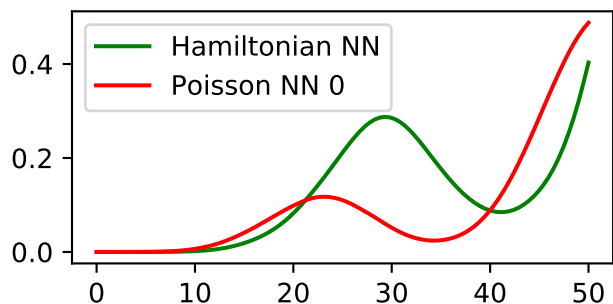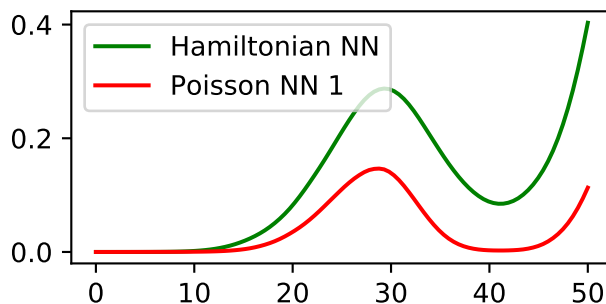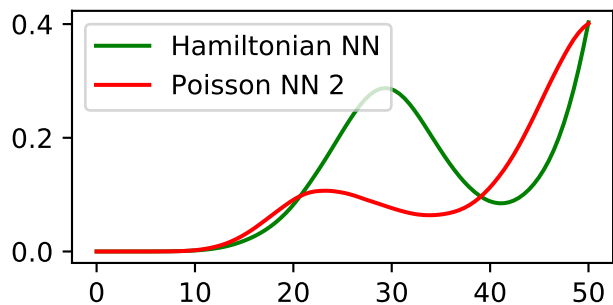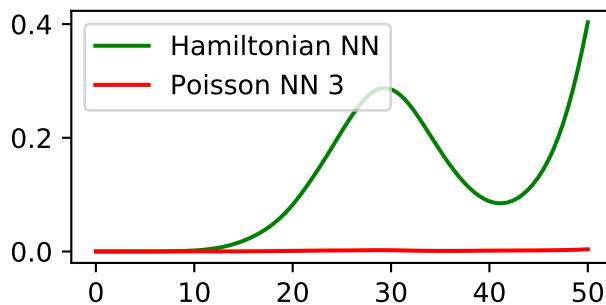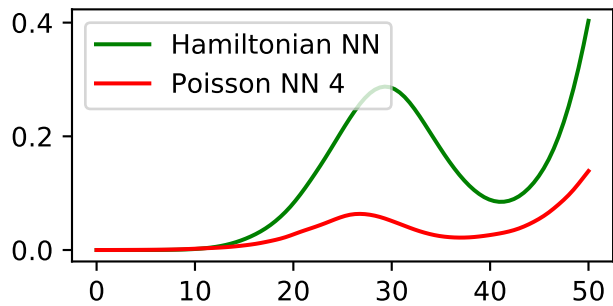

Supplement: supplementary_material [file attachment]

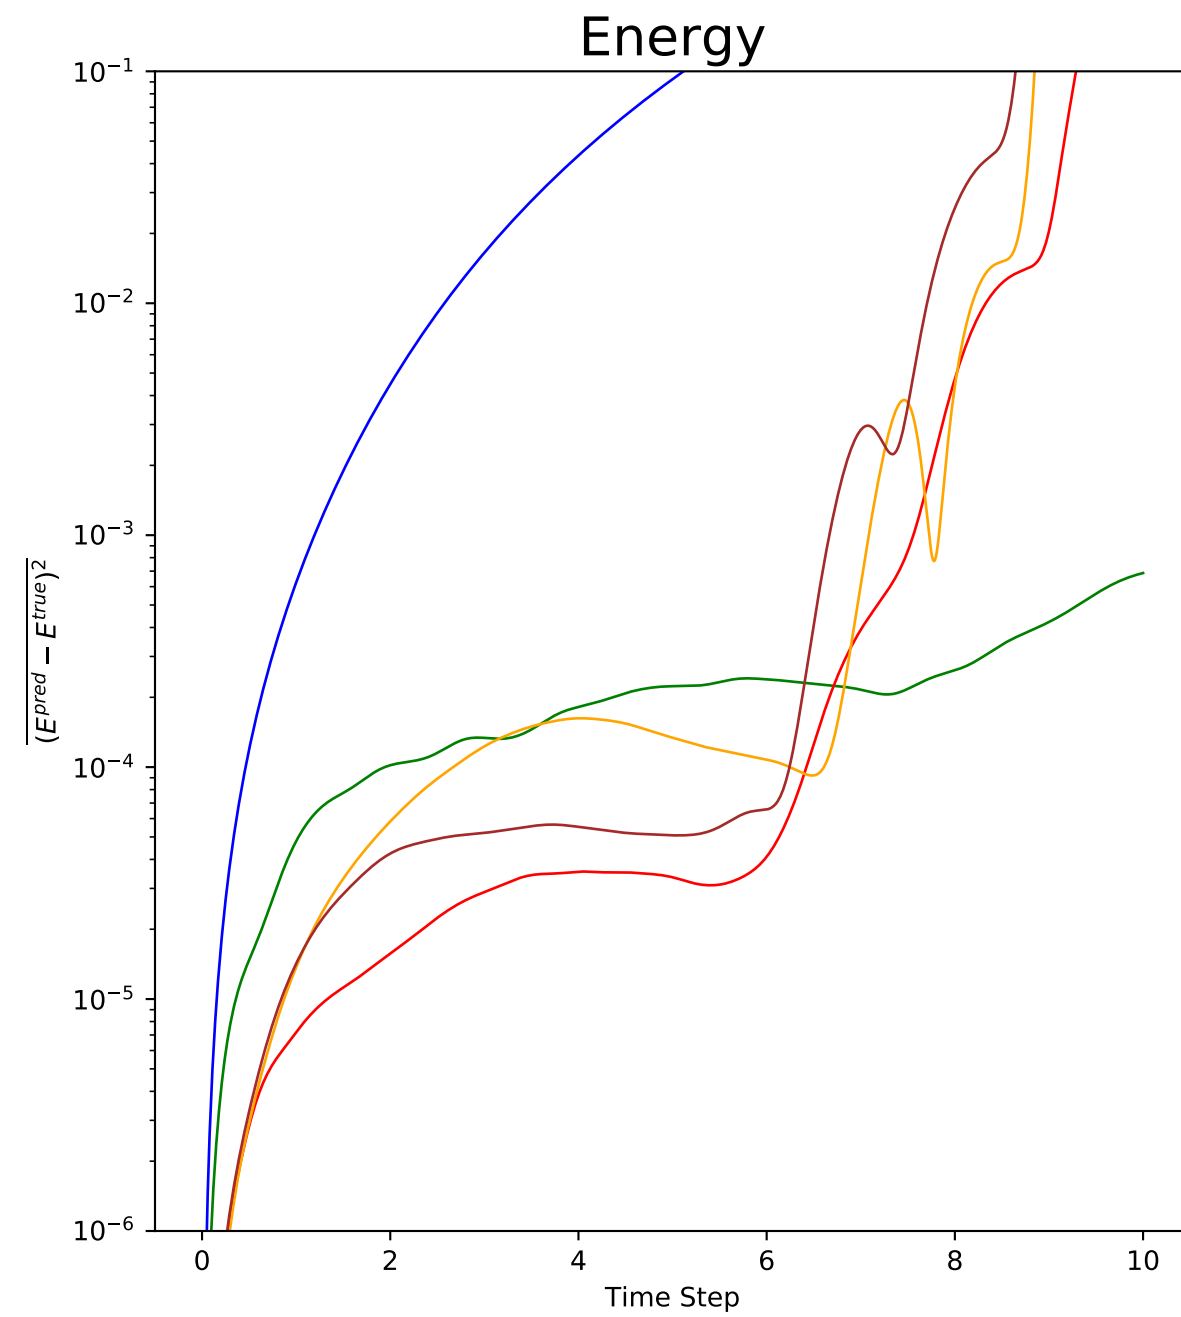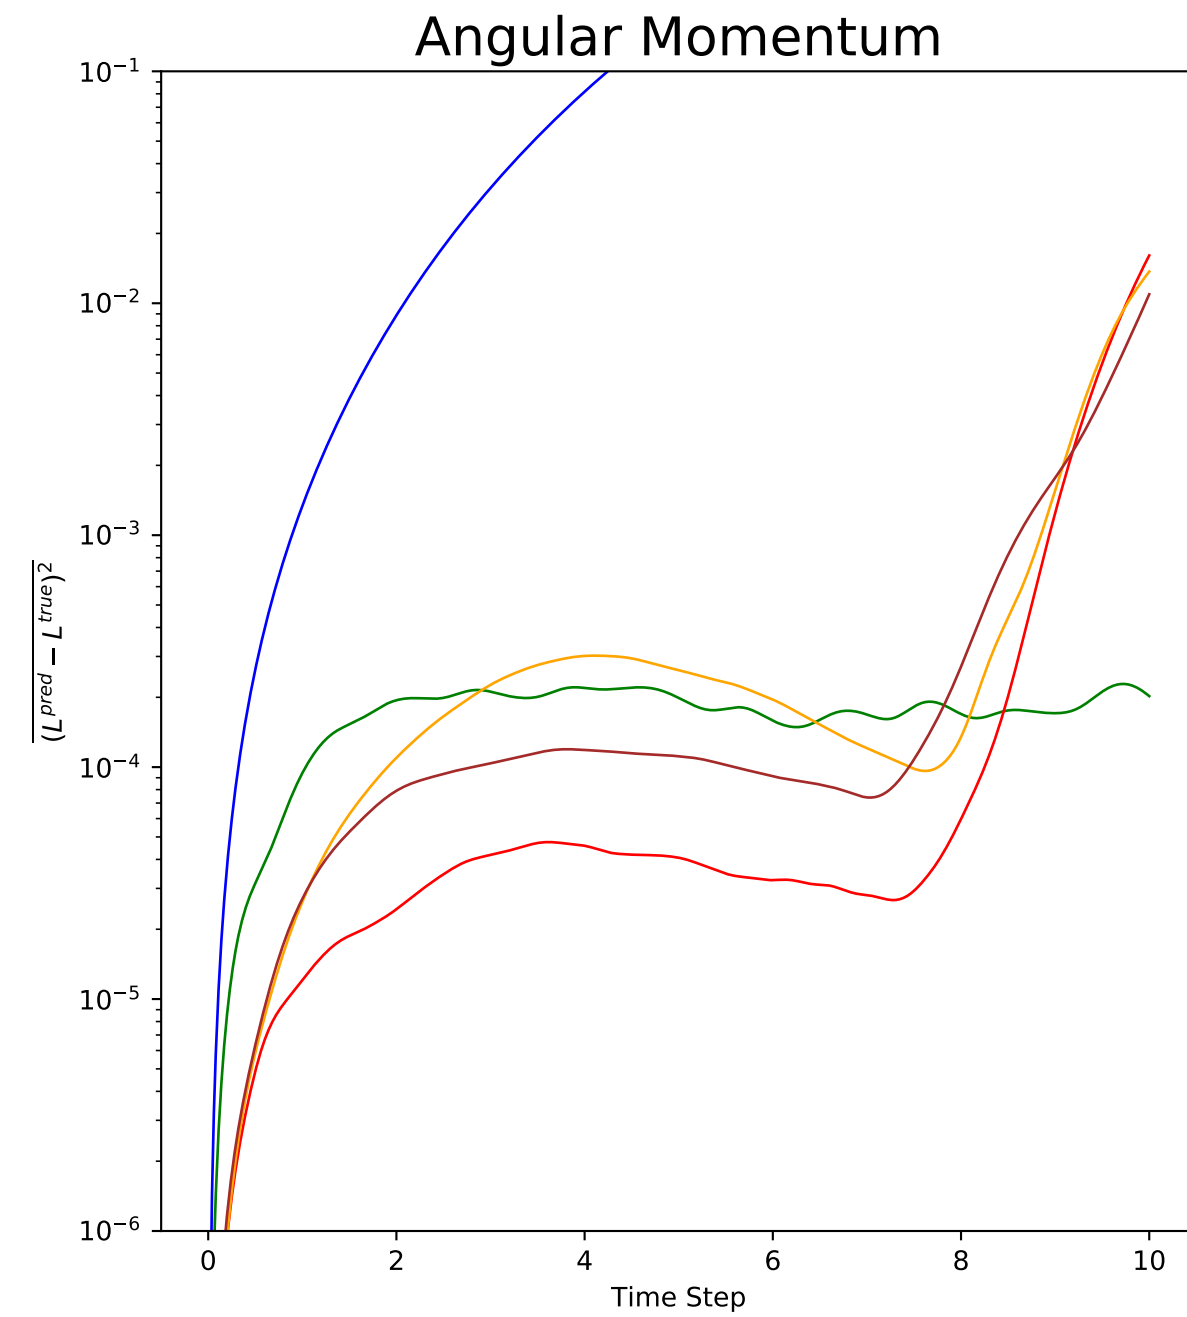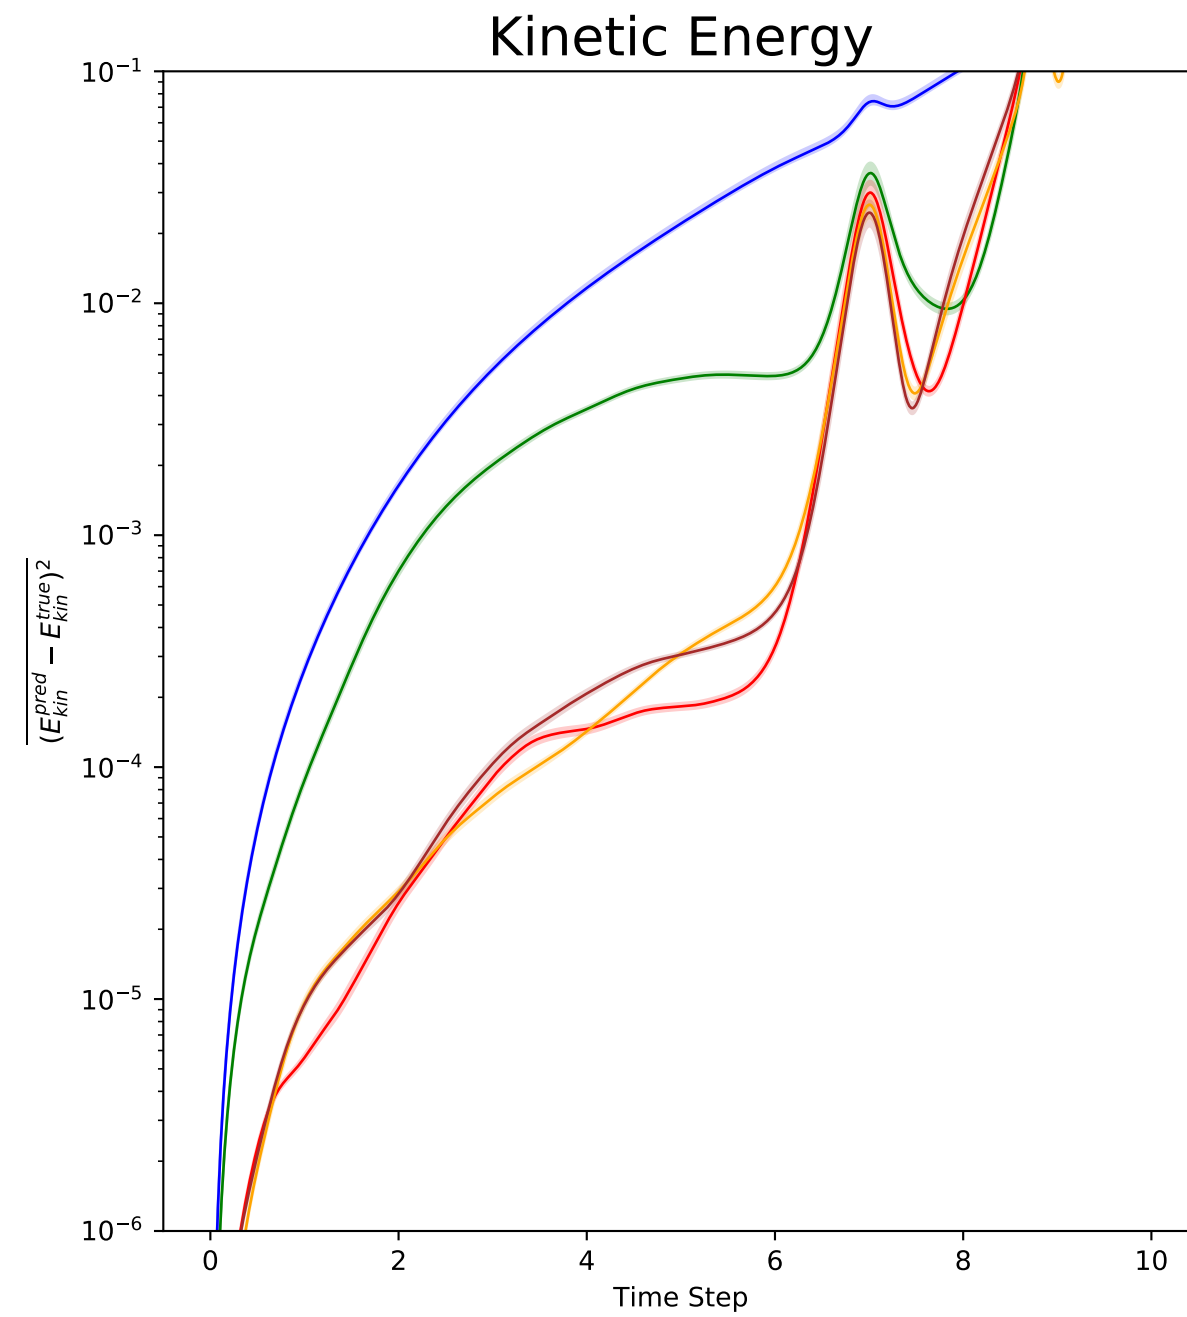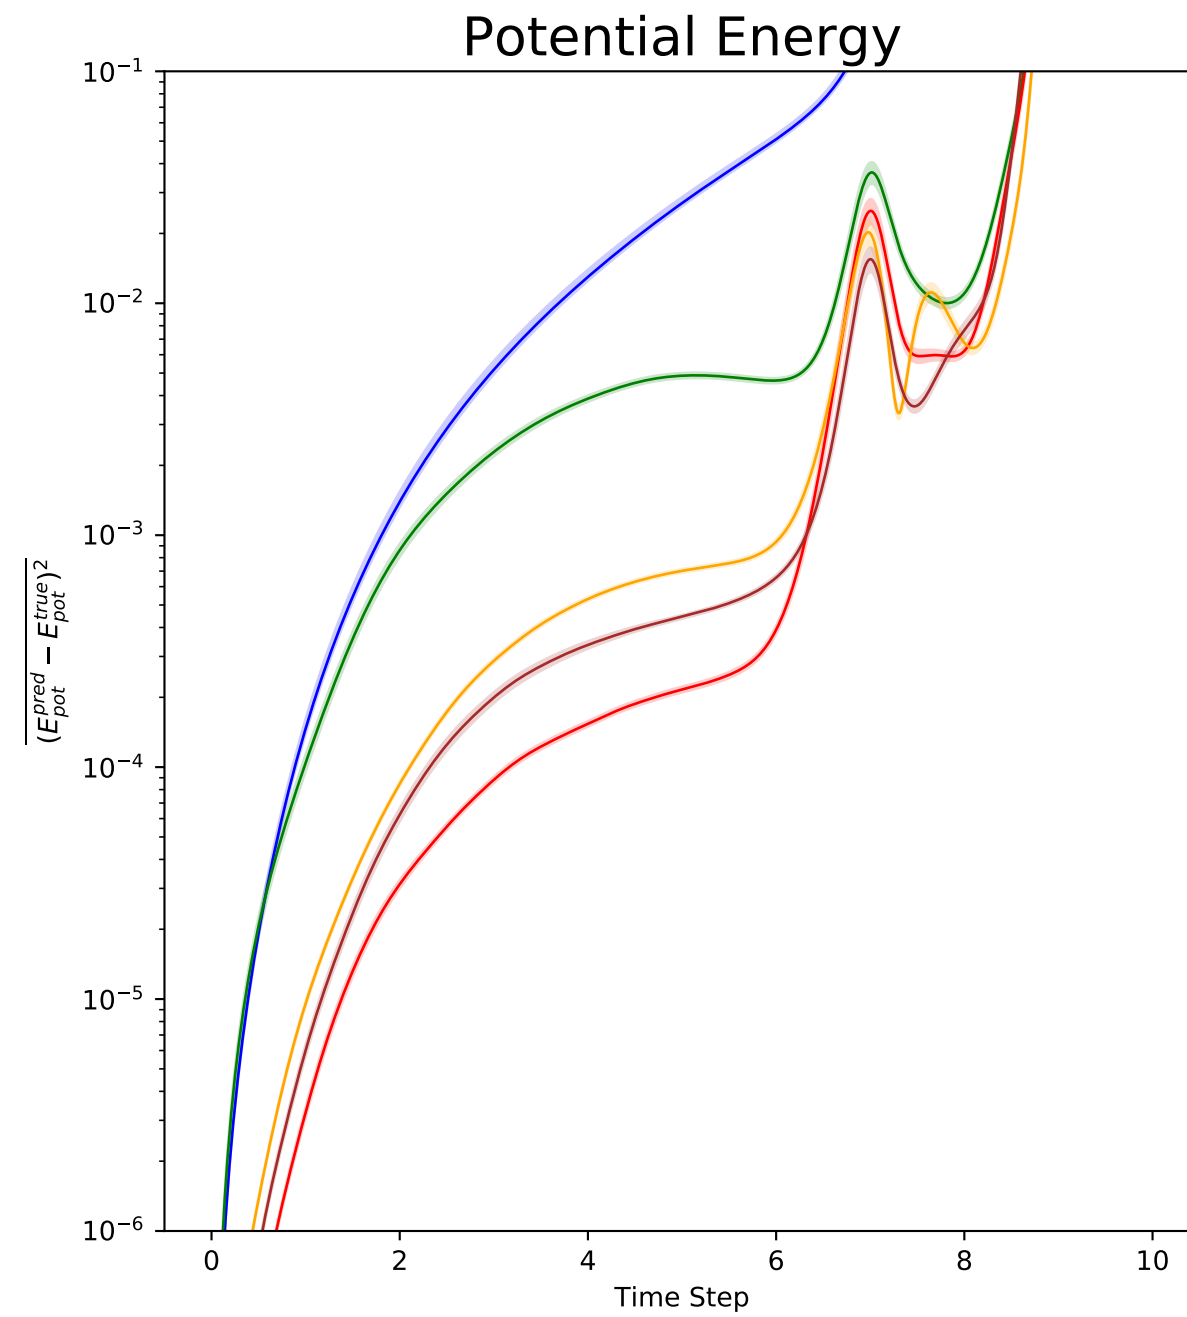

Supplement: supplementary_material [file attachment]

Deviation from True Trajectory

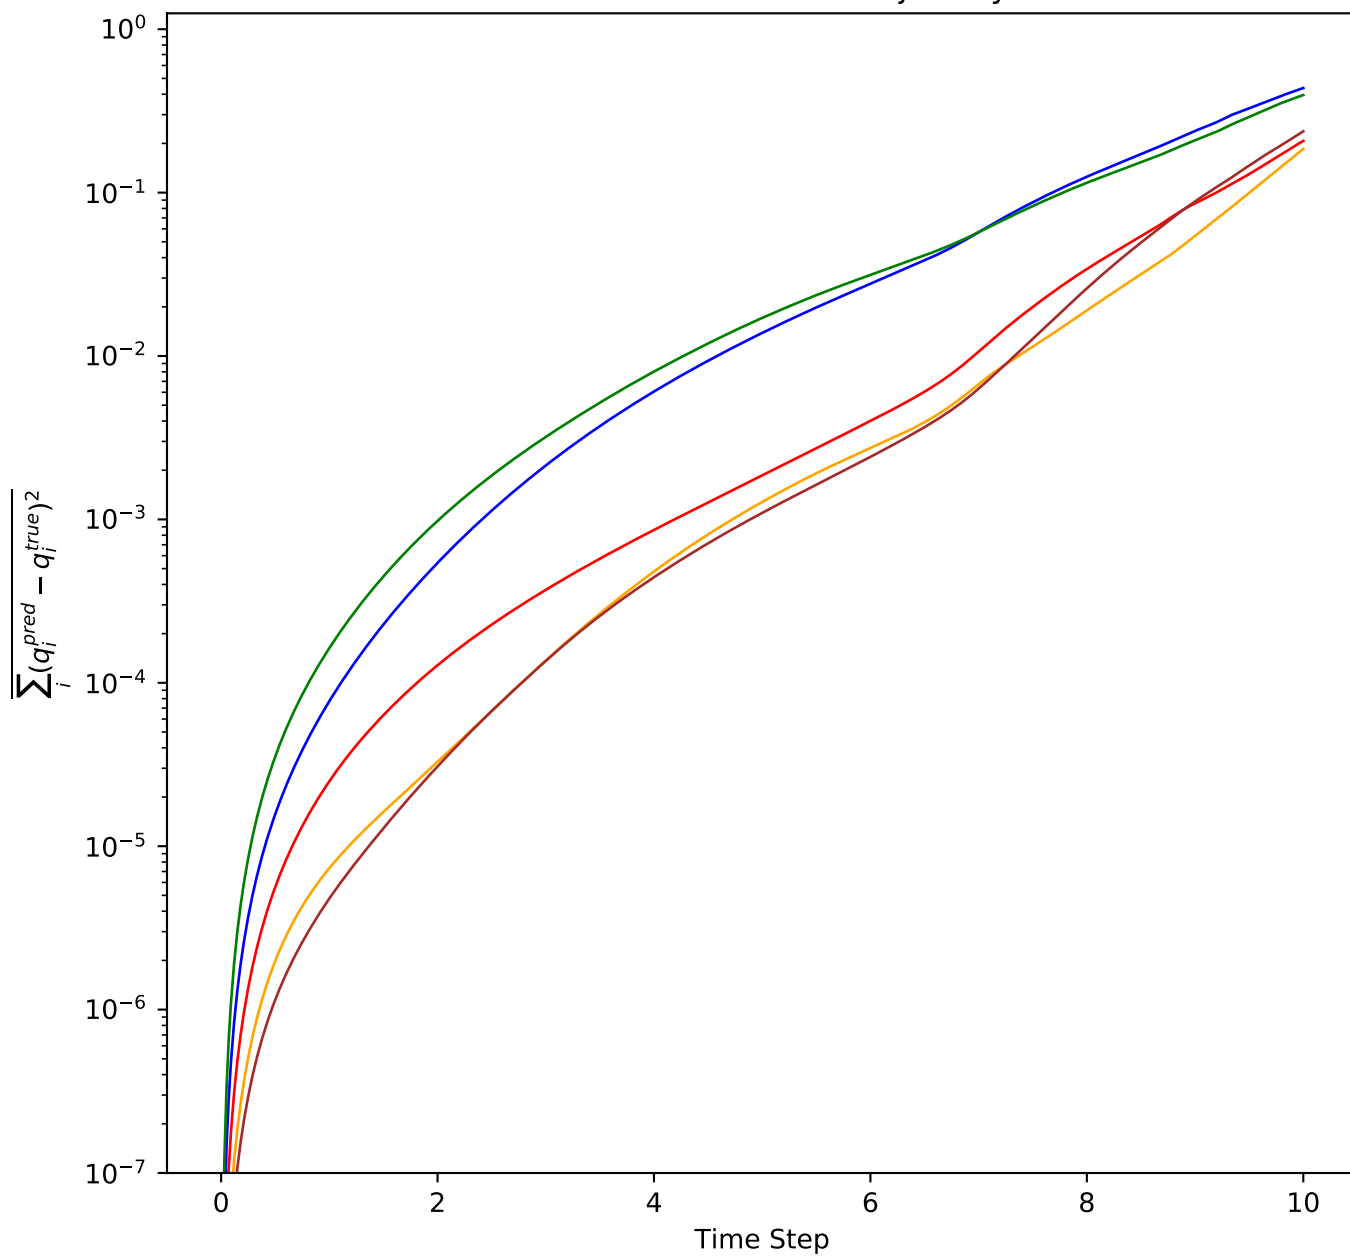

Supplement: supplementary_material [file attachment]

Ground Truth

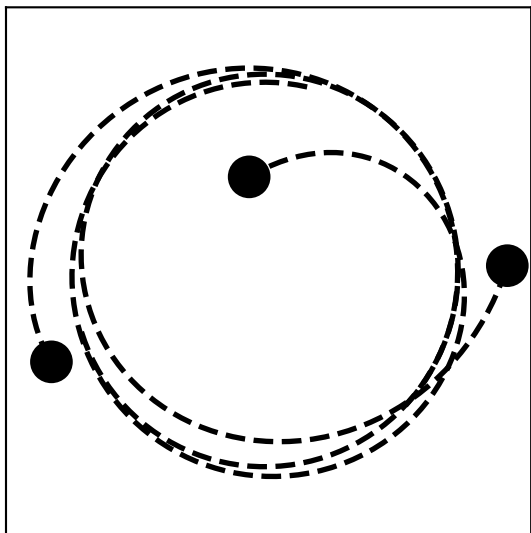

Baseline NN

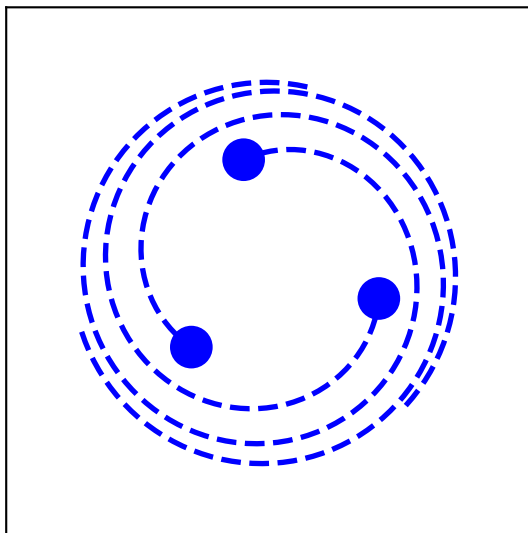

HNN

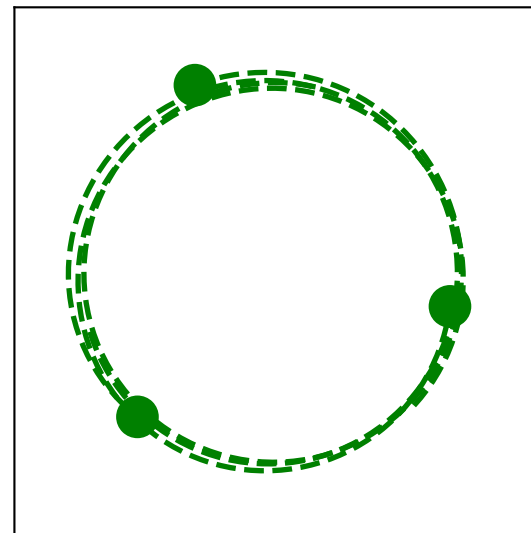

Model 1

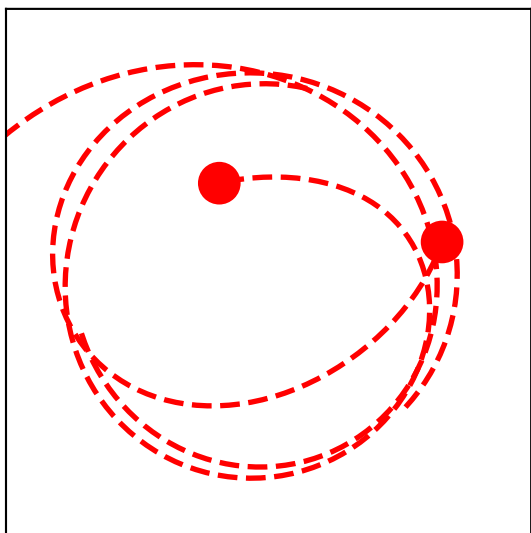

Model 2

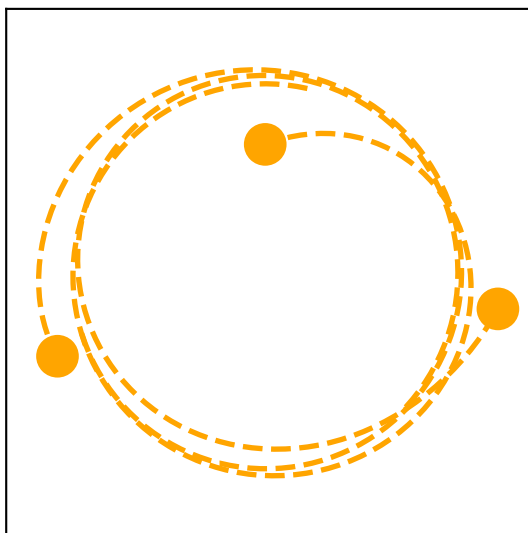

Model 3

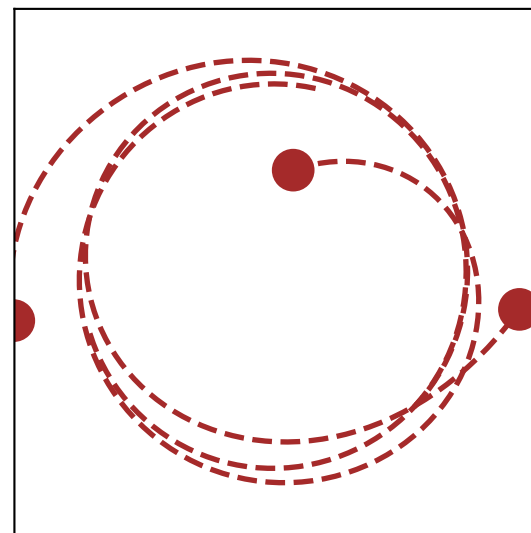

Supplement: supplementary_material [file attachment]

Ground Truth

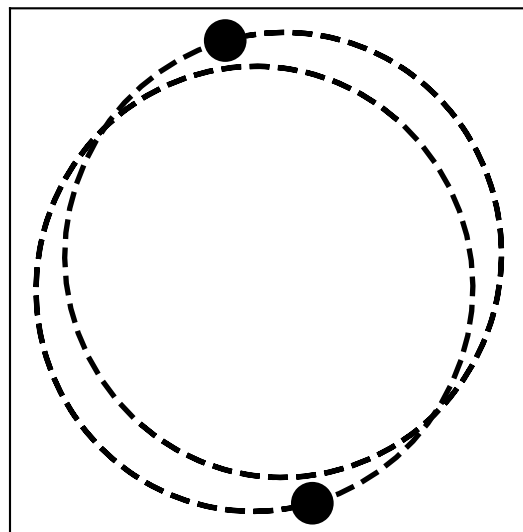

Baseline NN

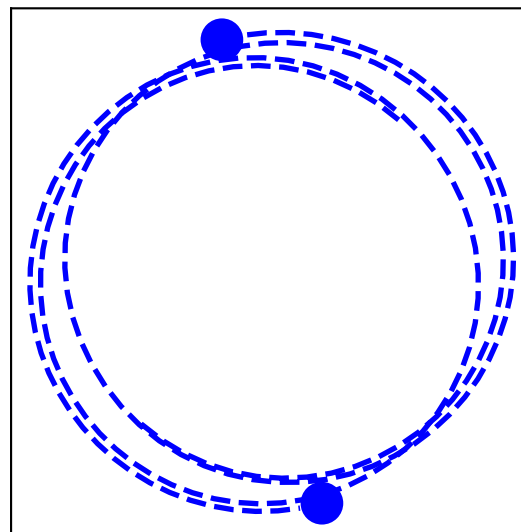

HNN

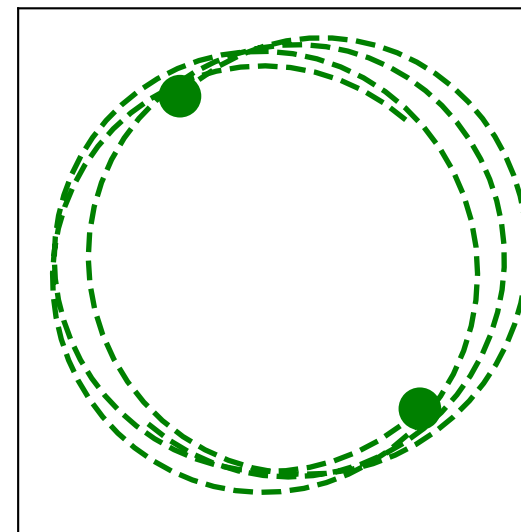

Model 1

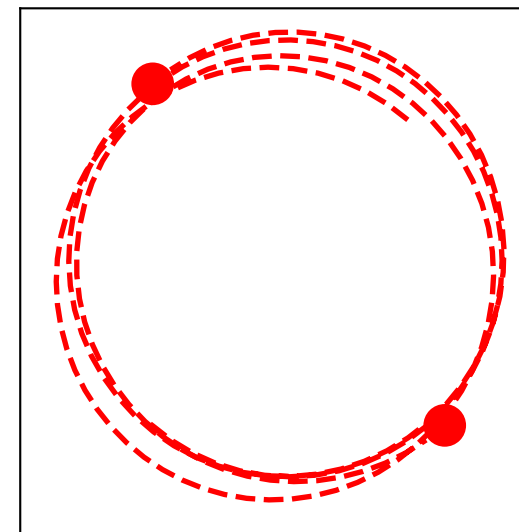

Model 2

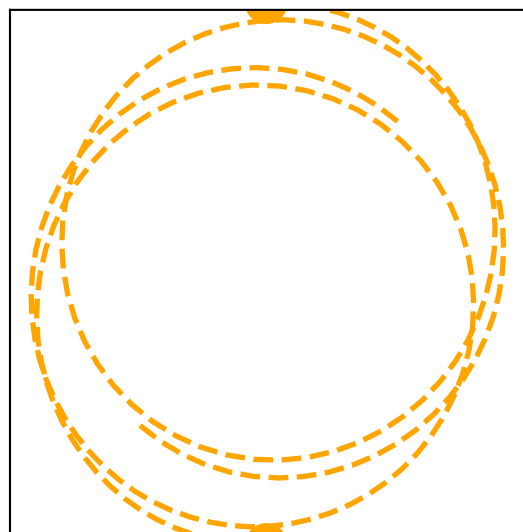

Model 3

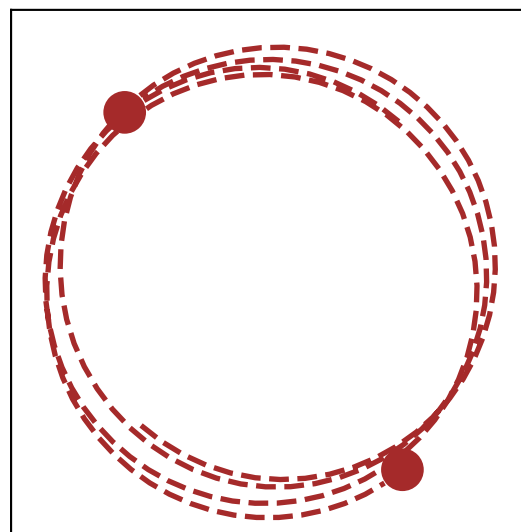

Model 4

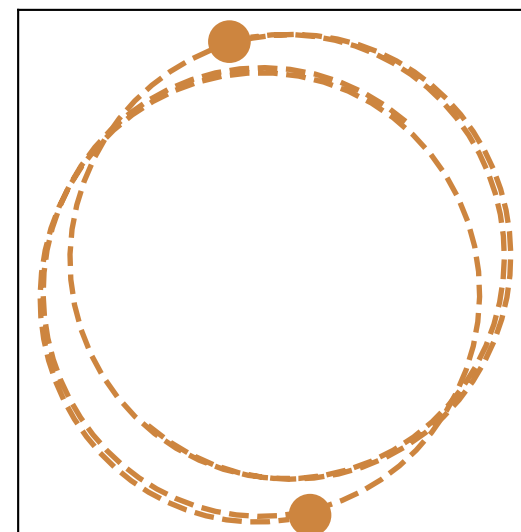

Model 5

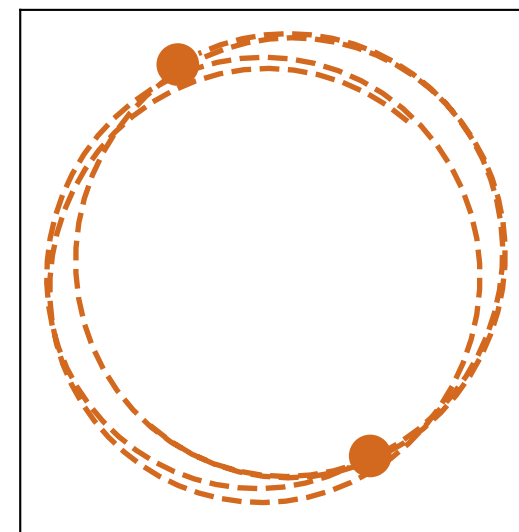

Supplement: supplementary_material [file attachment]

Deviation from True Trajectory



Supplement: supplementary_material [file attachment]

Ground Truth



Baseline NN

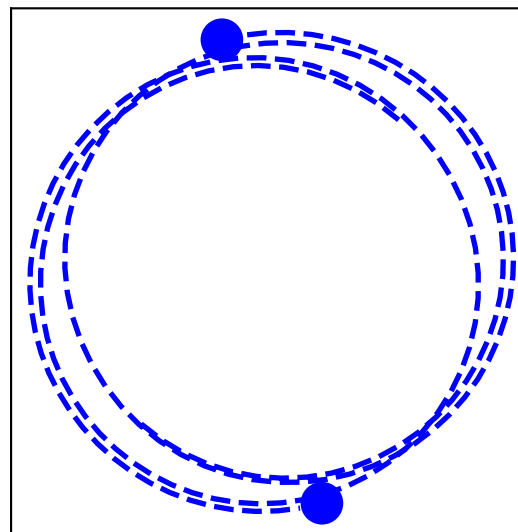

HNN

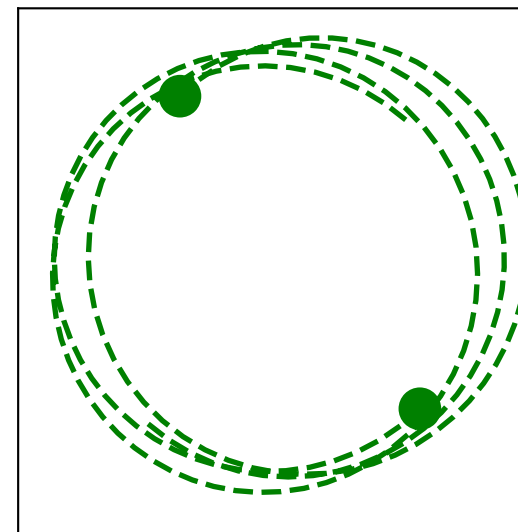

Model 1

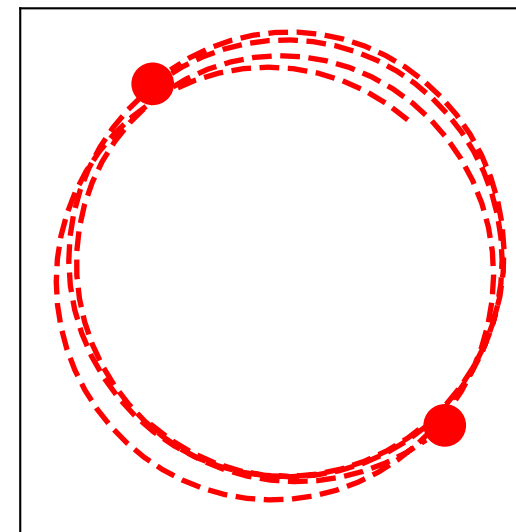

Model 2



Model 3

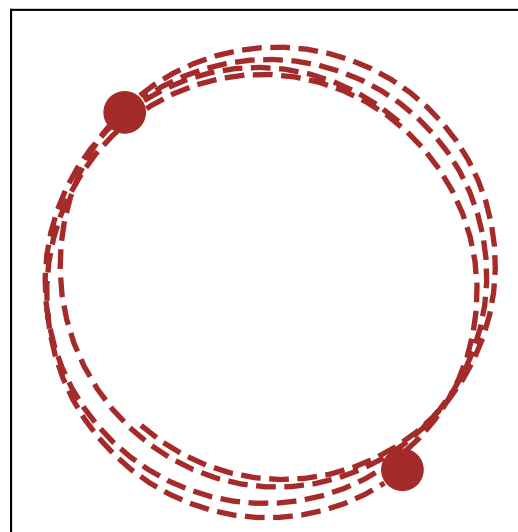

Model 4

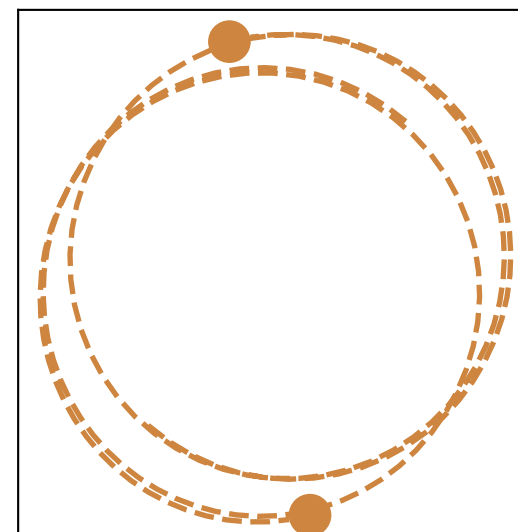

Model 5

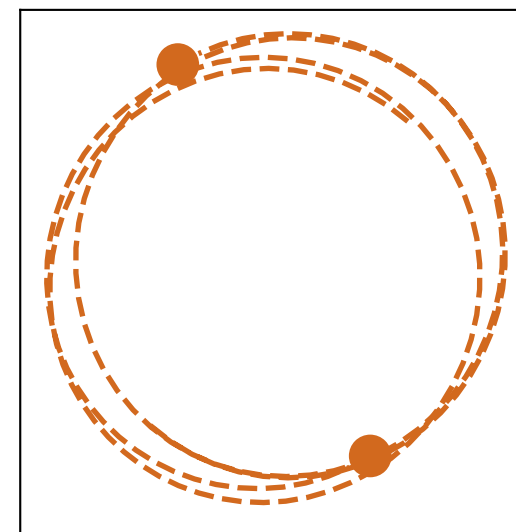

Supplement: supplementary_material [file attachment]

Deviation from True Trajectory

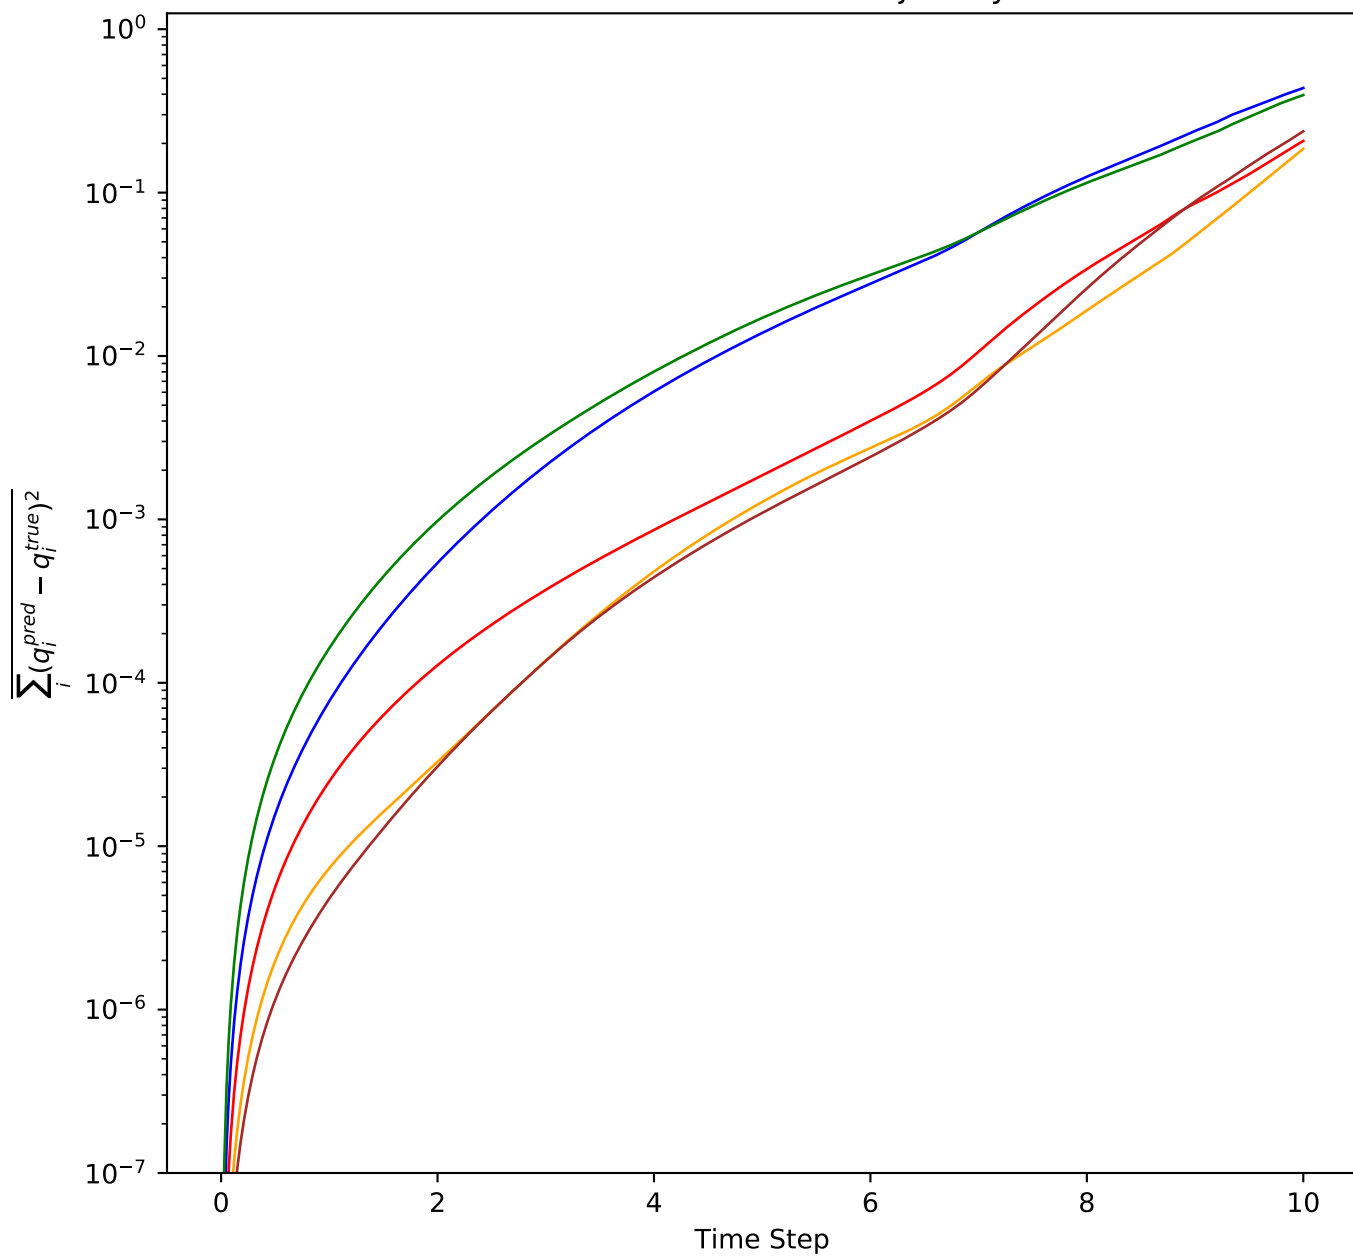

Supplement: supplementary_material [file attachment]

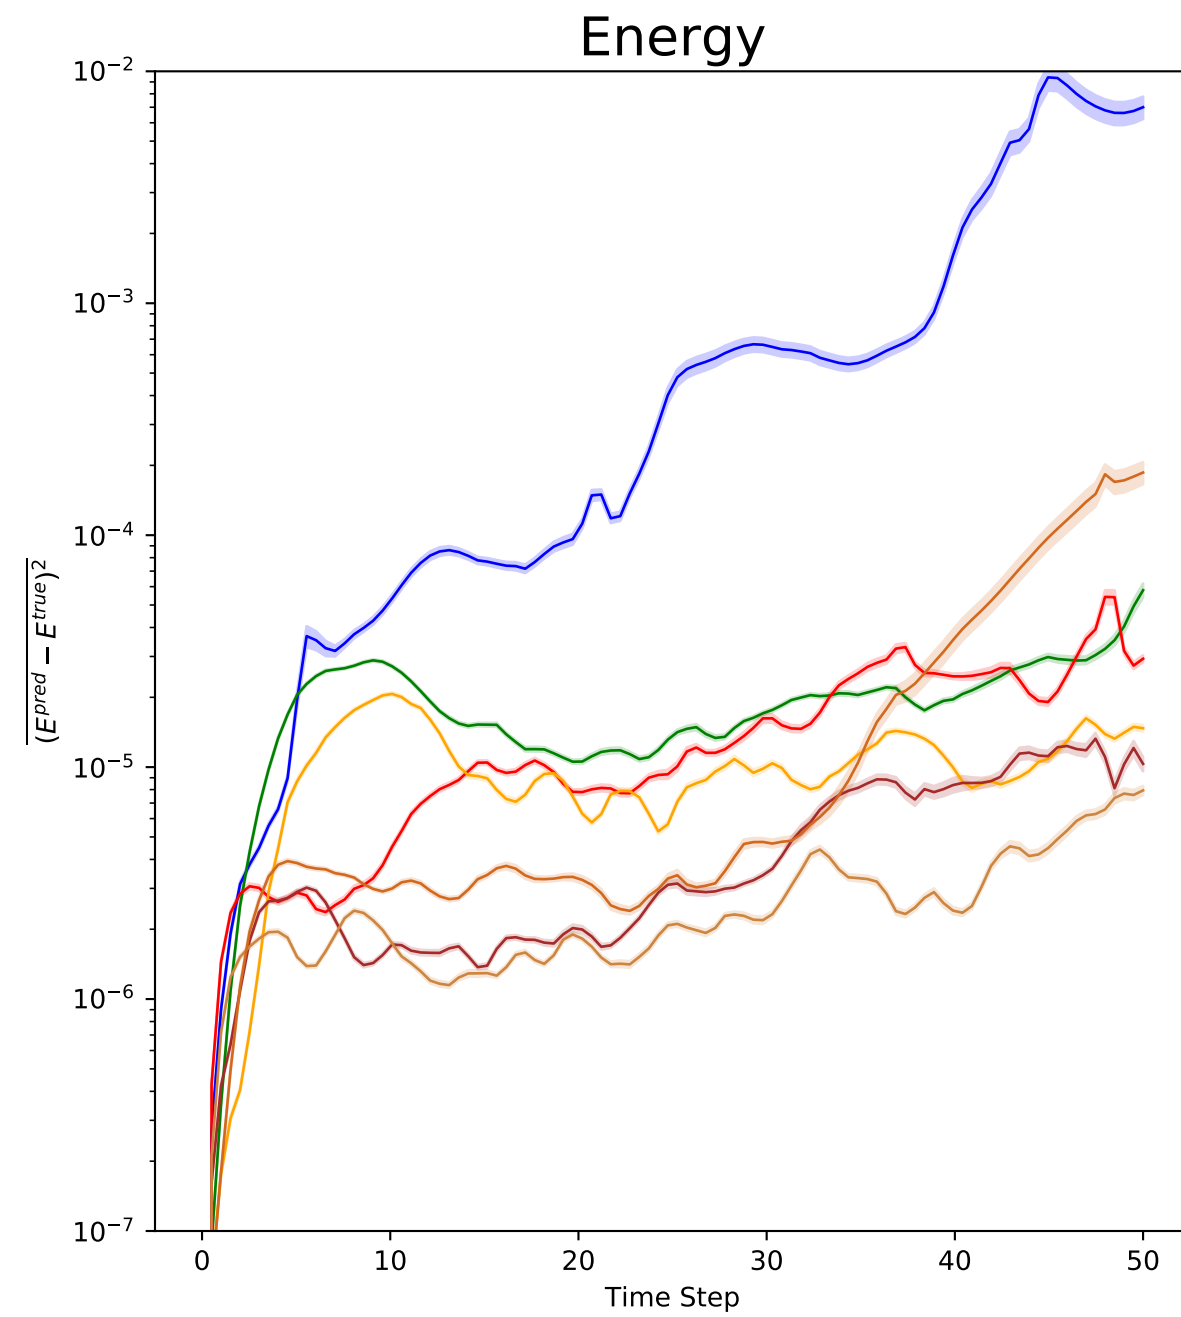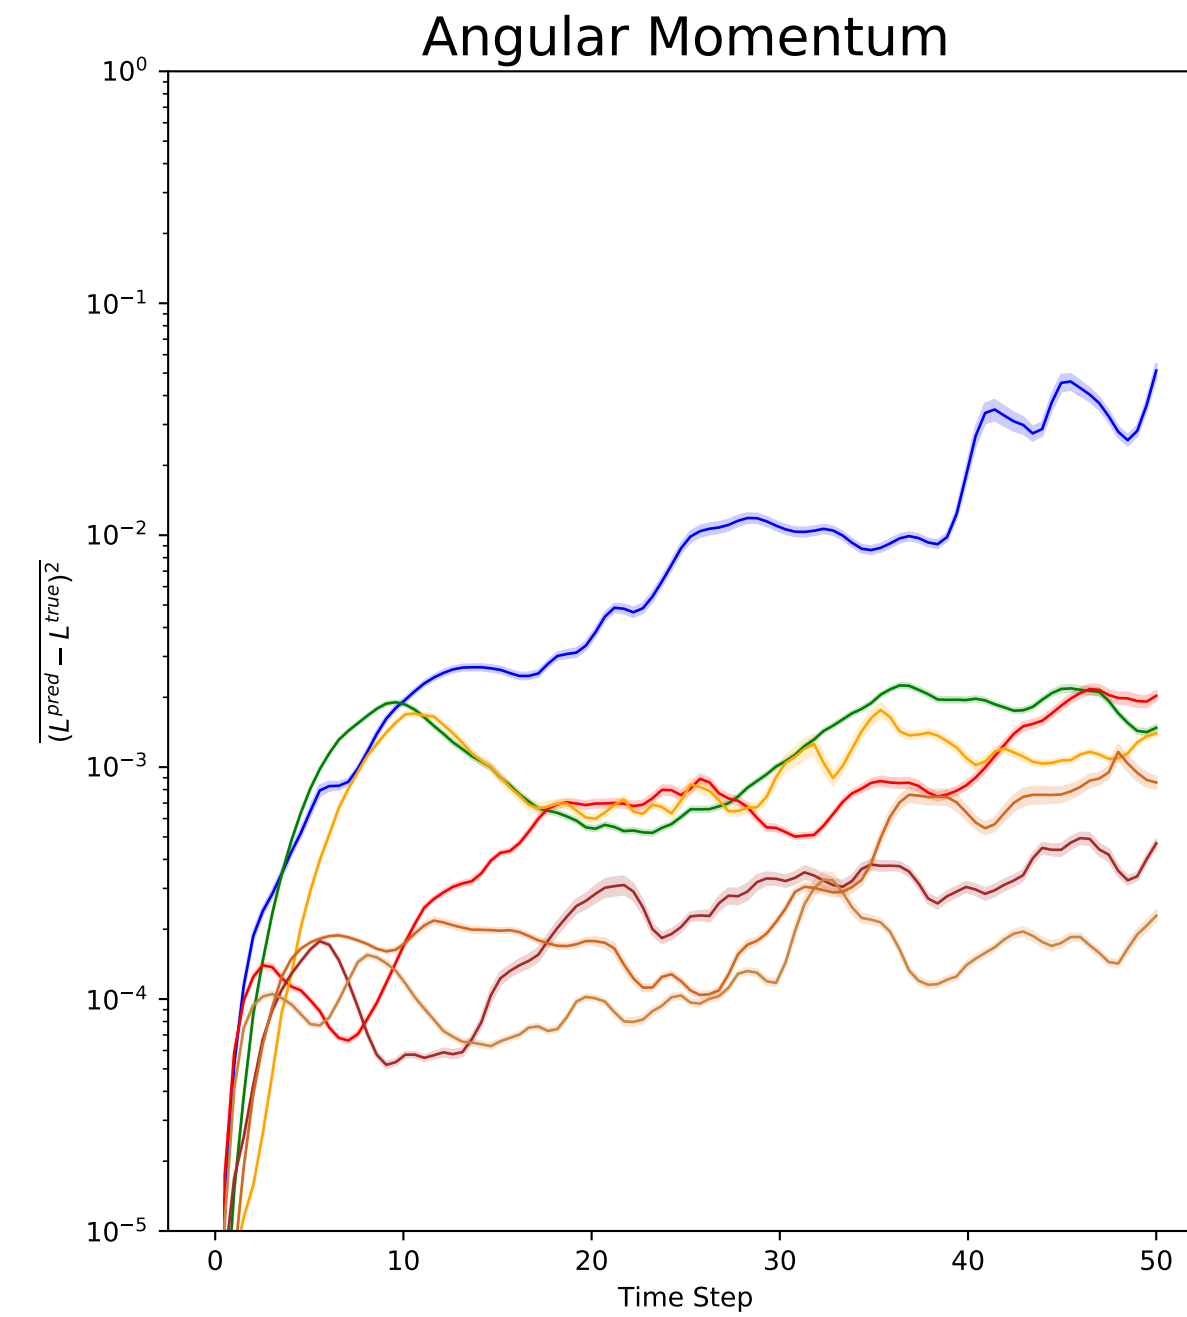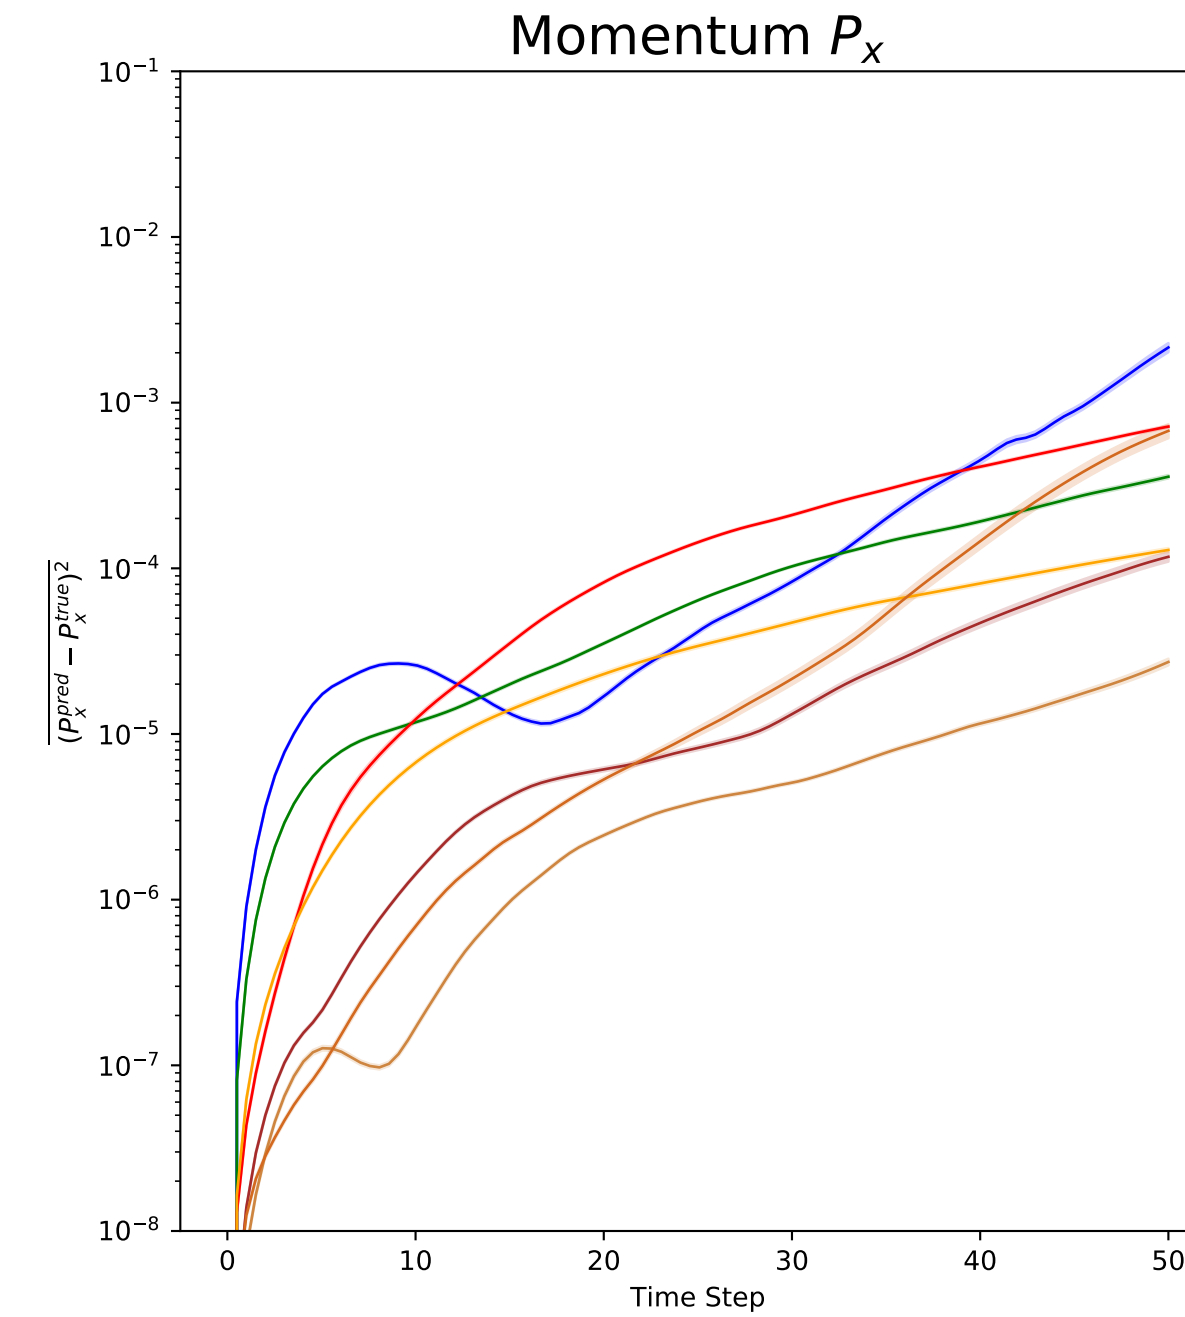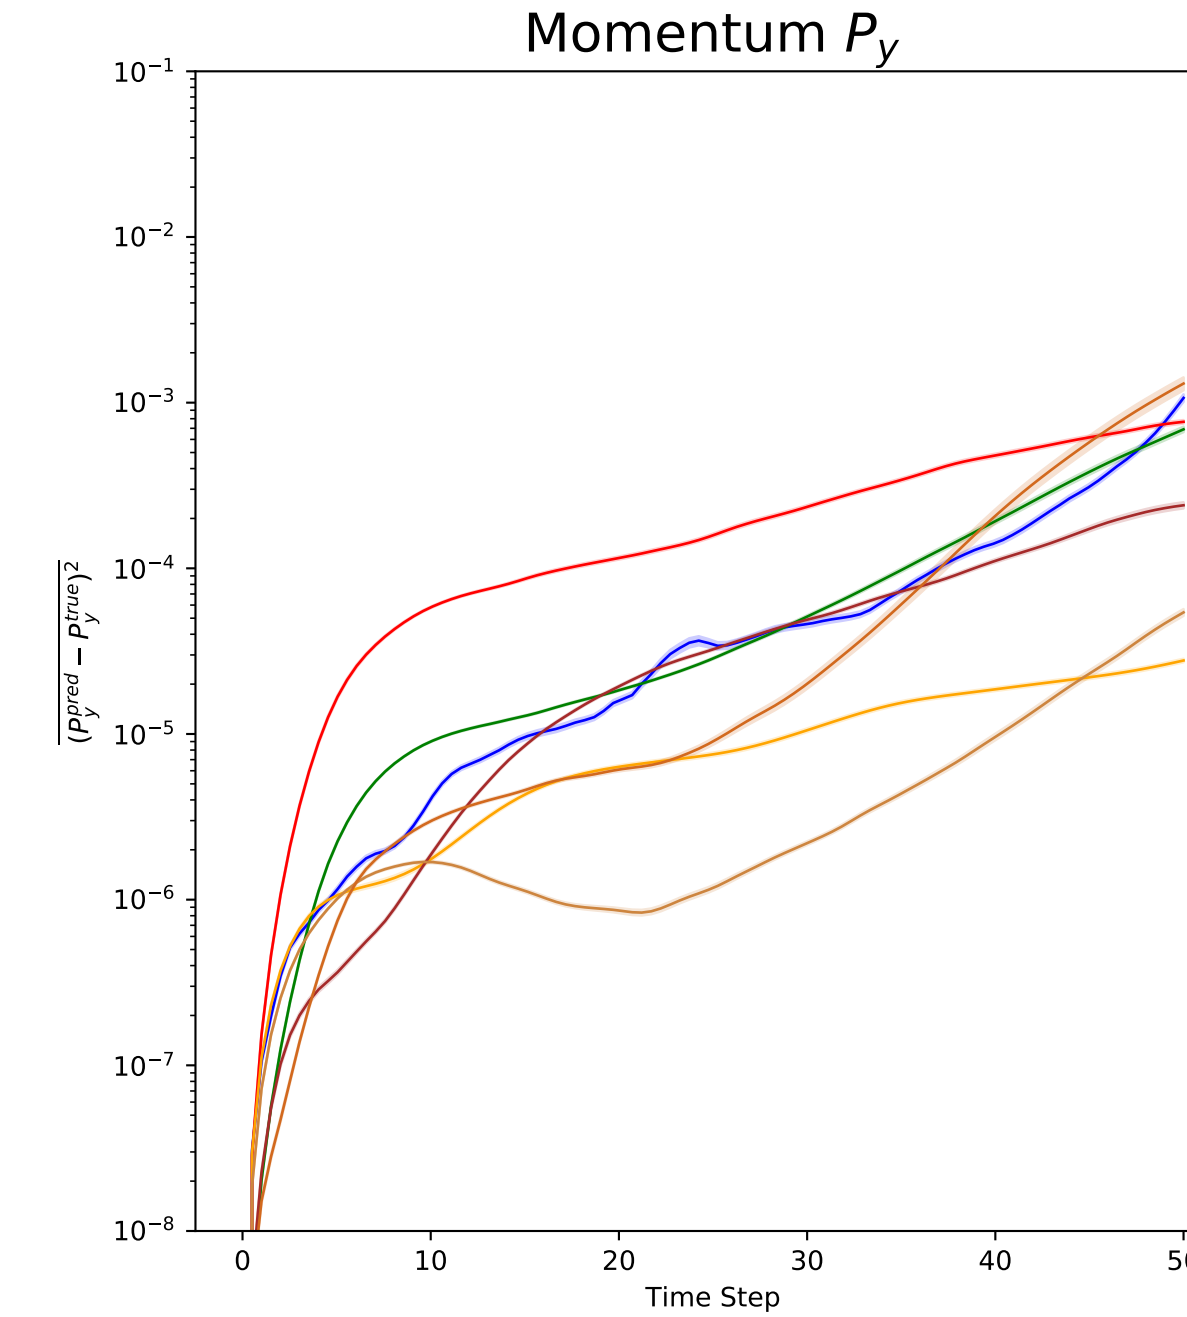

Supplement: supplementary_material [file attachment]

Ground Truth

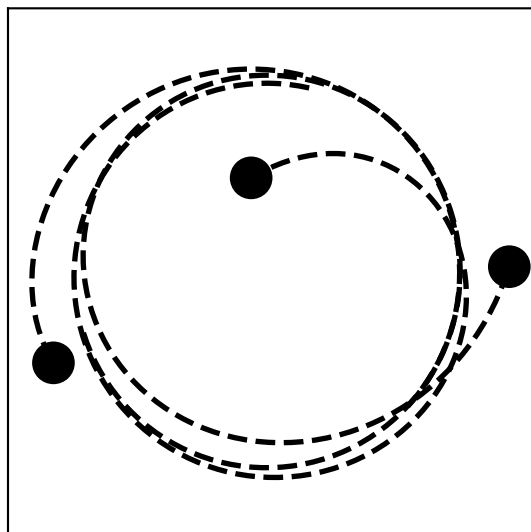

Baseline NN

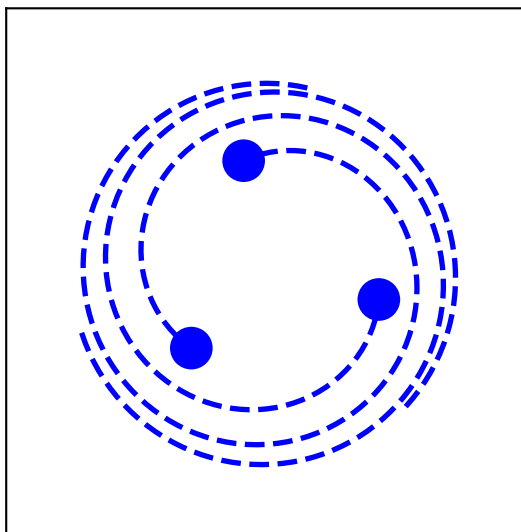

HNN

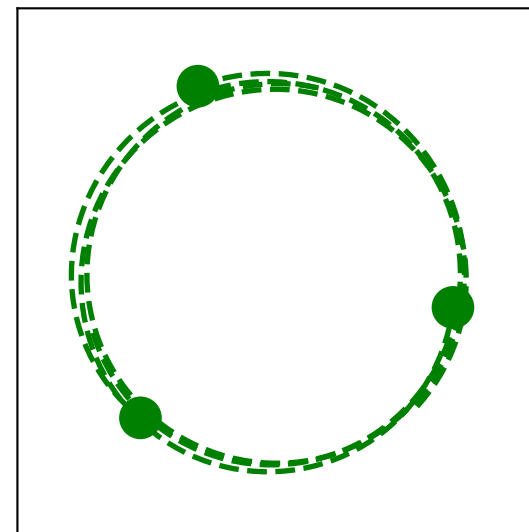

Model 1

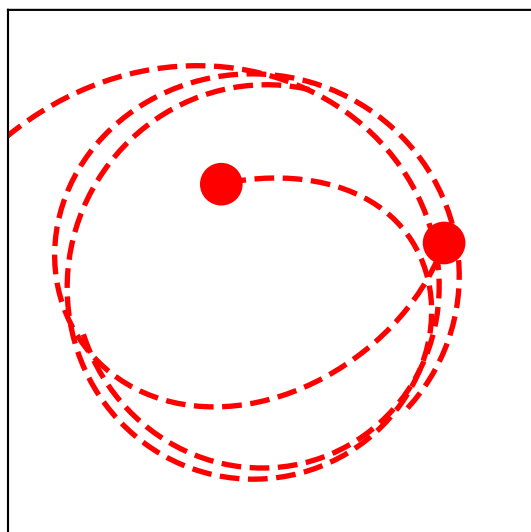

Model 2

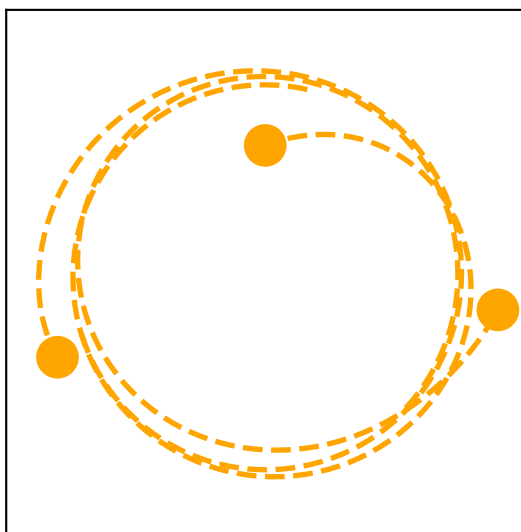

Model 3

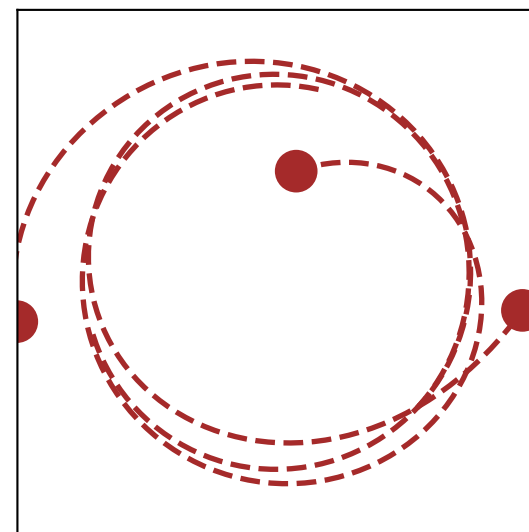

Supplement: supplementary_material [file attachment]

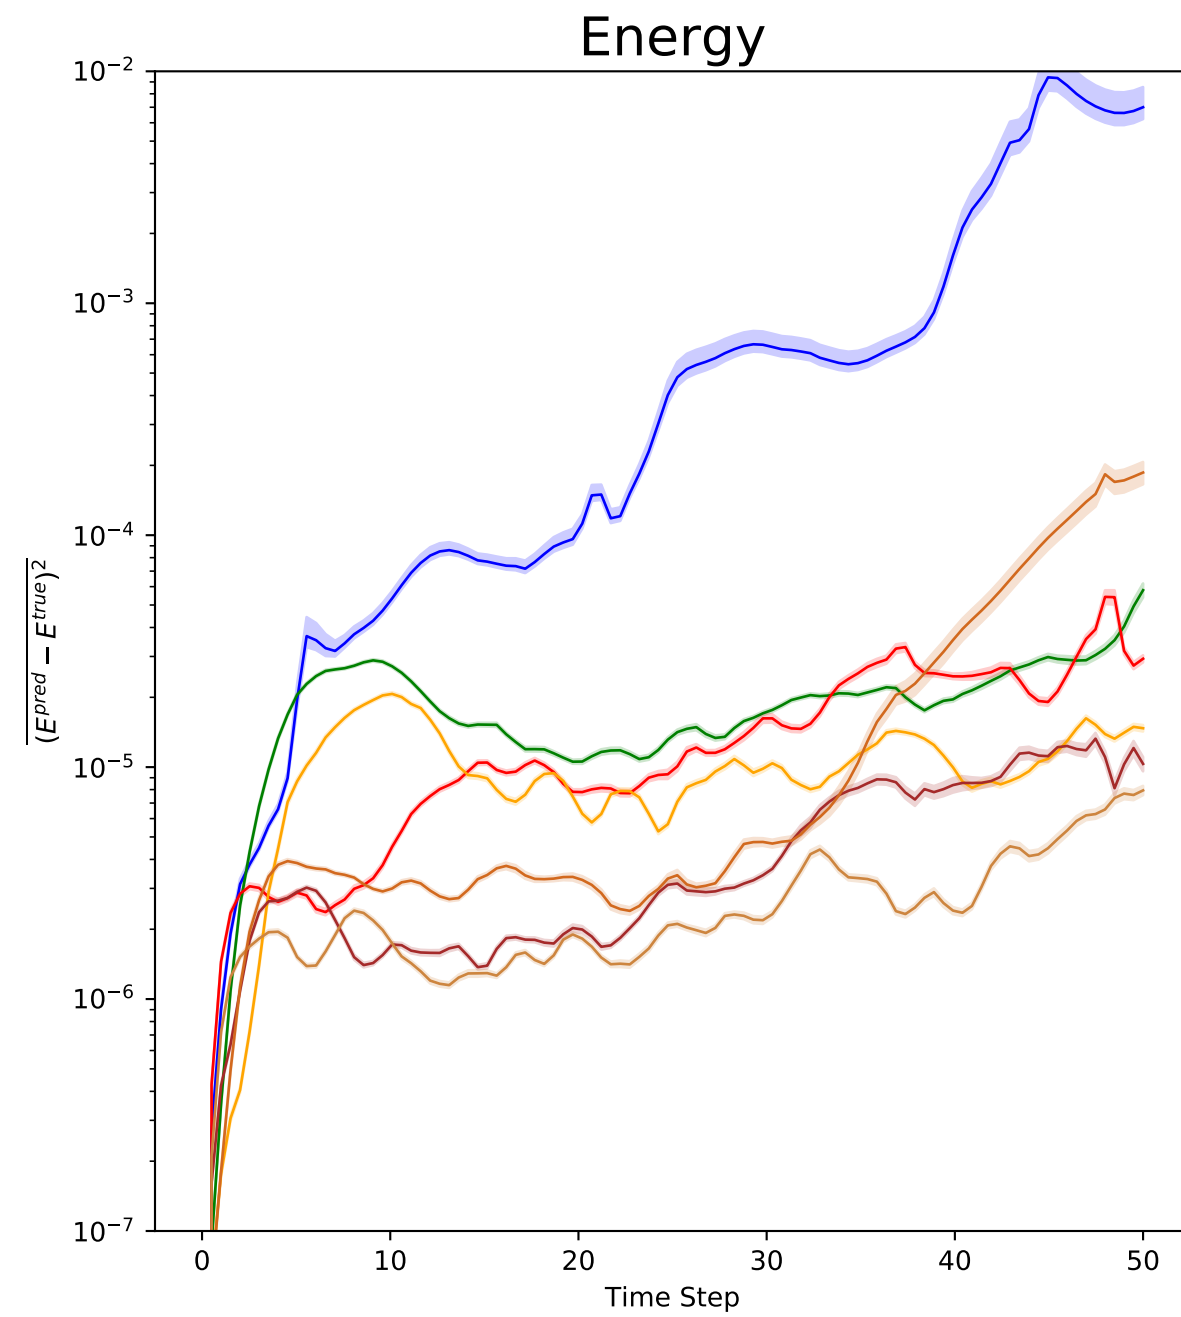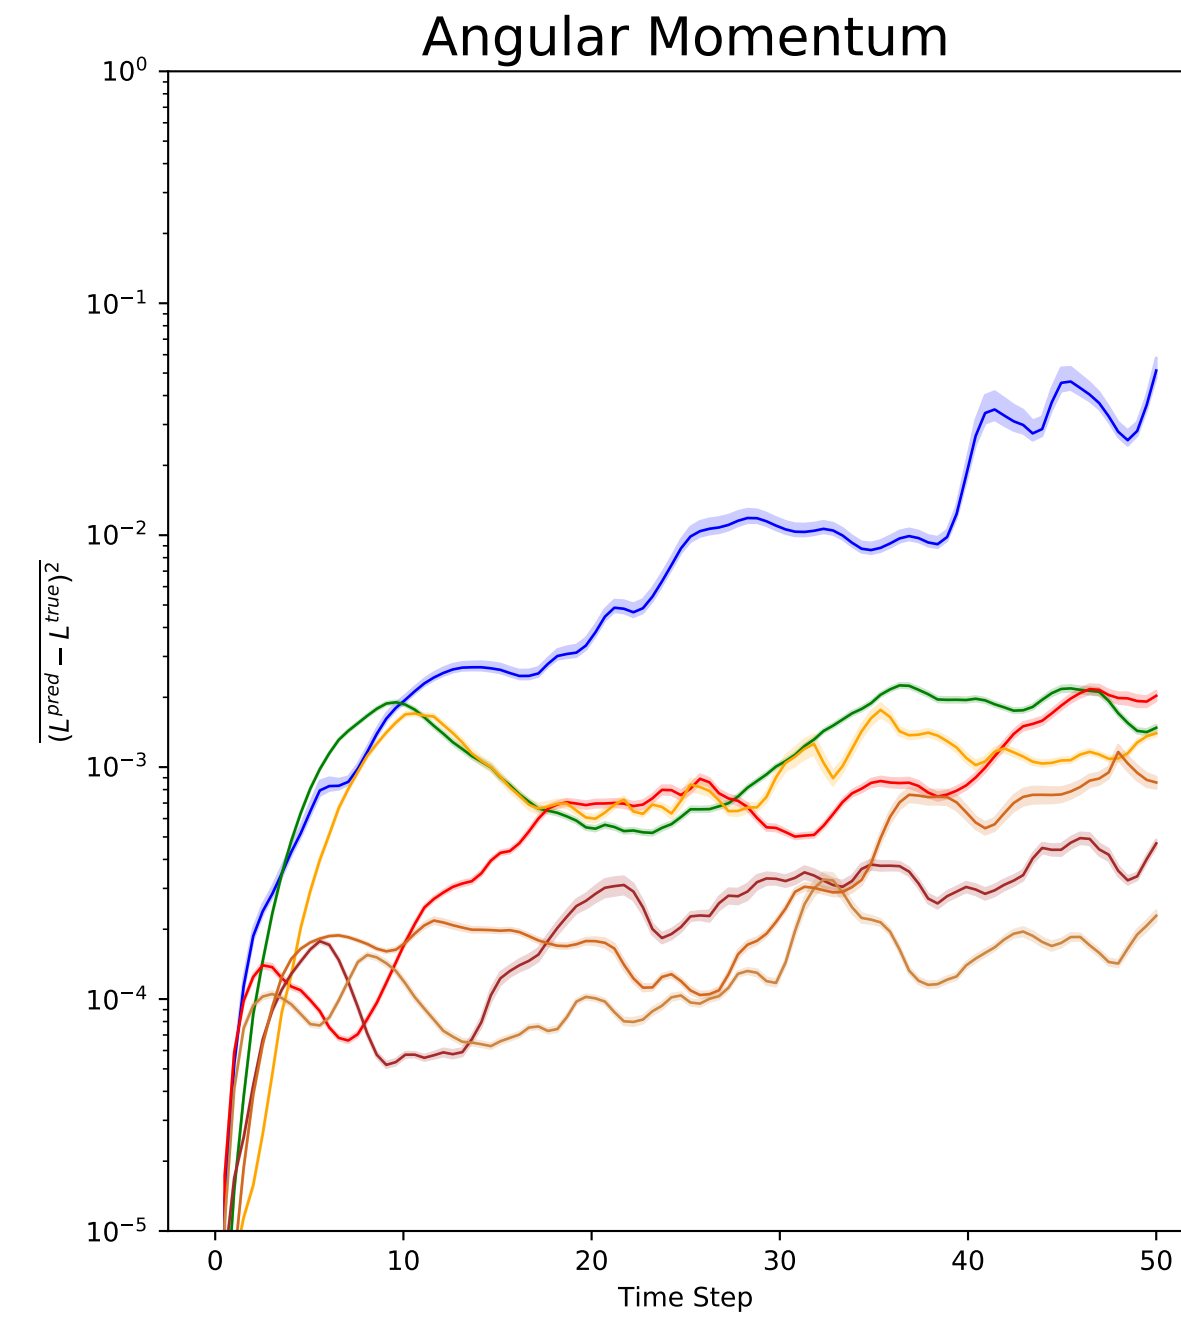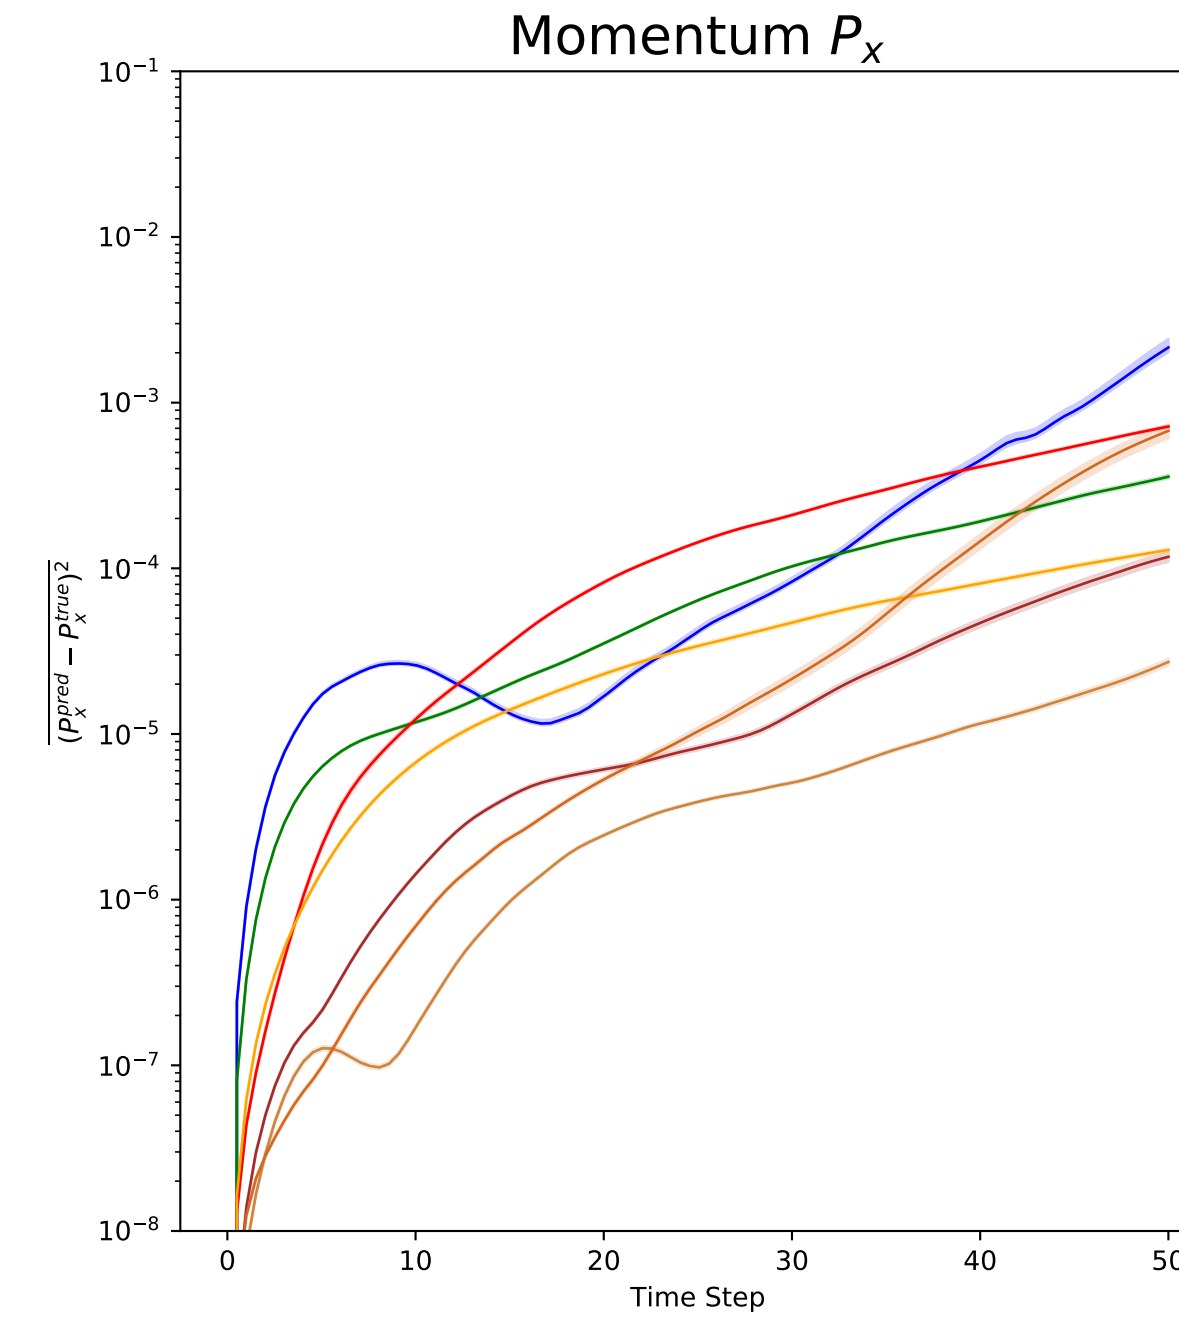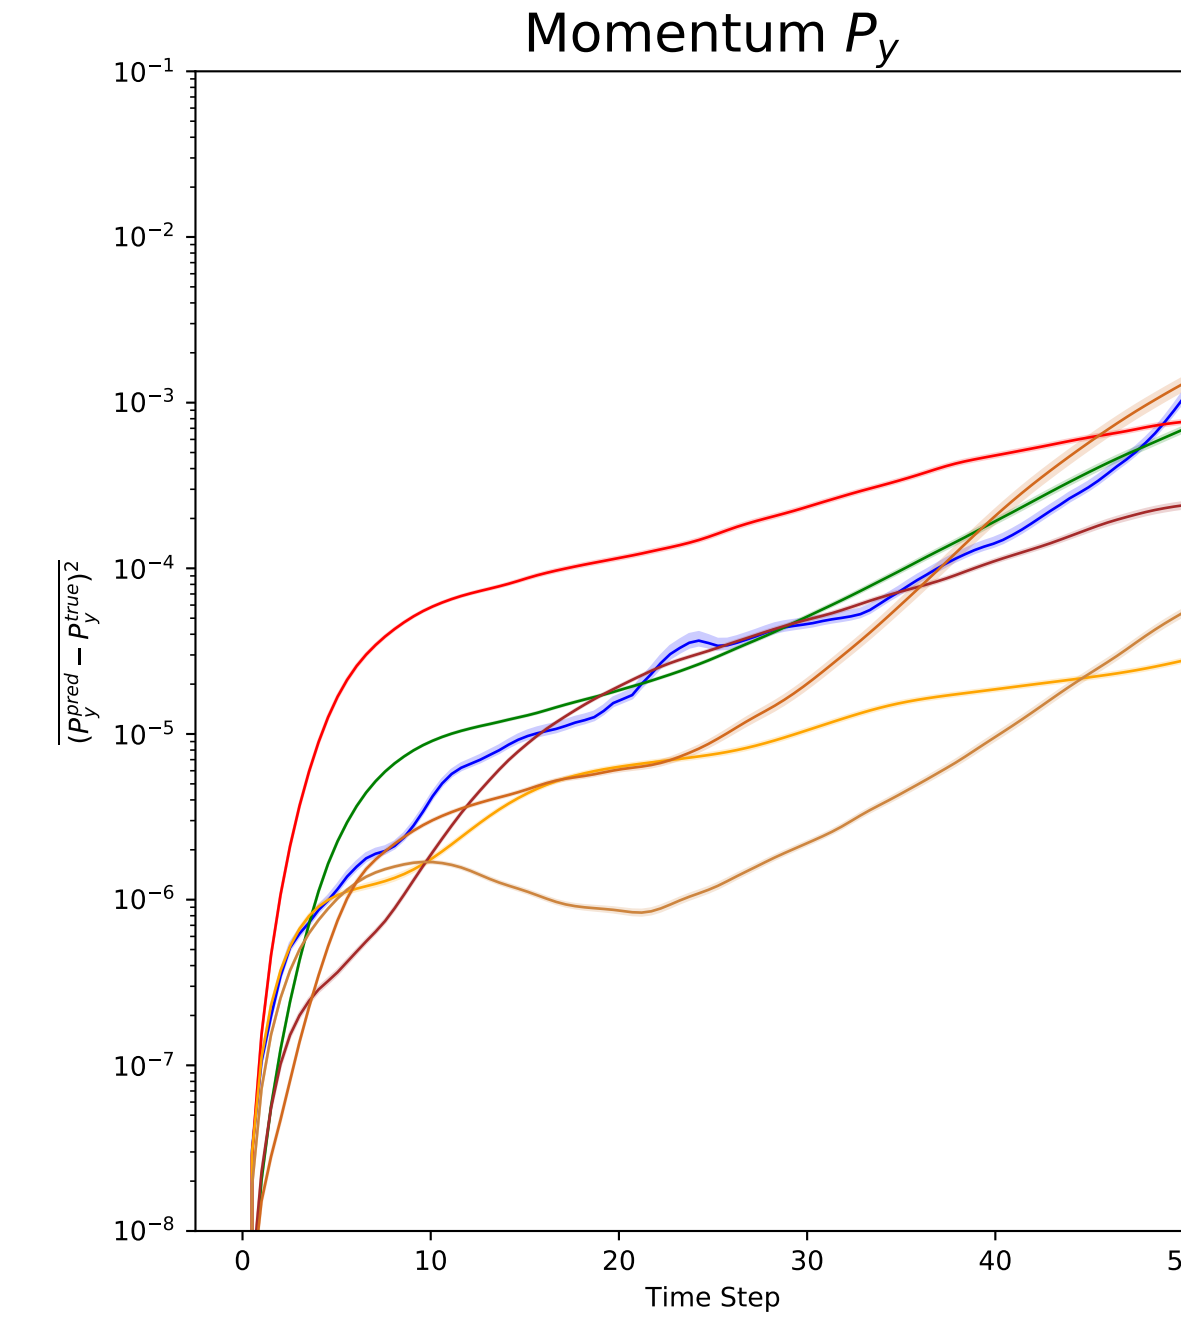

Supplement: supplementary_material [file attachment]

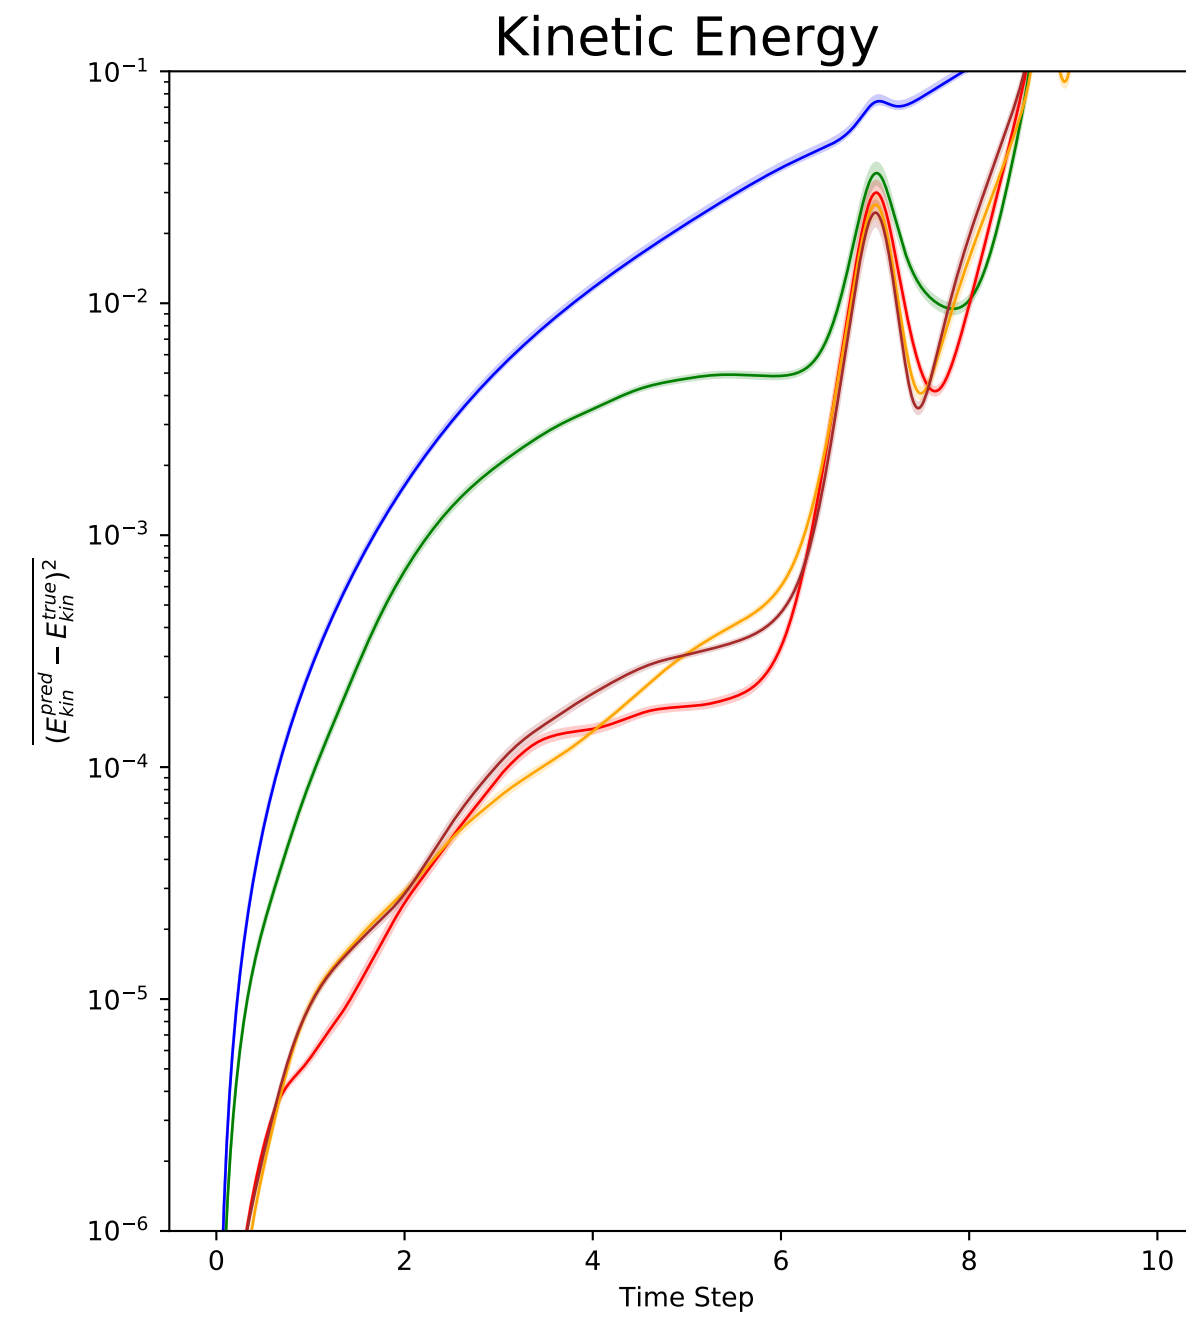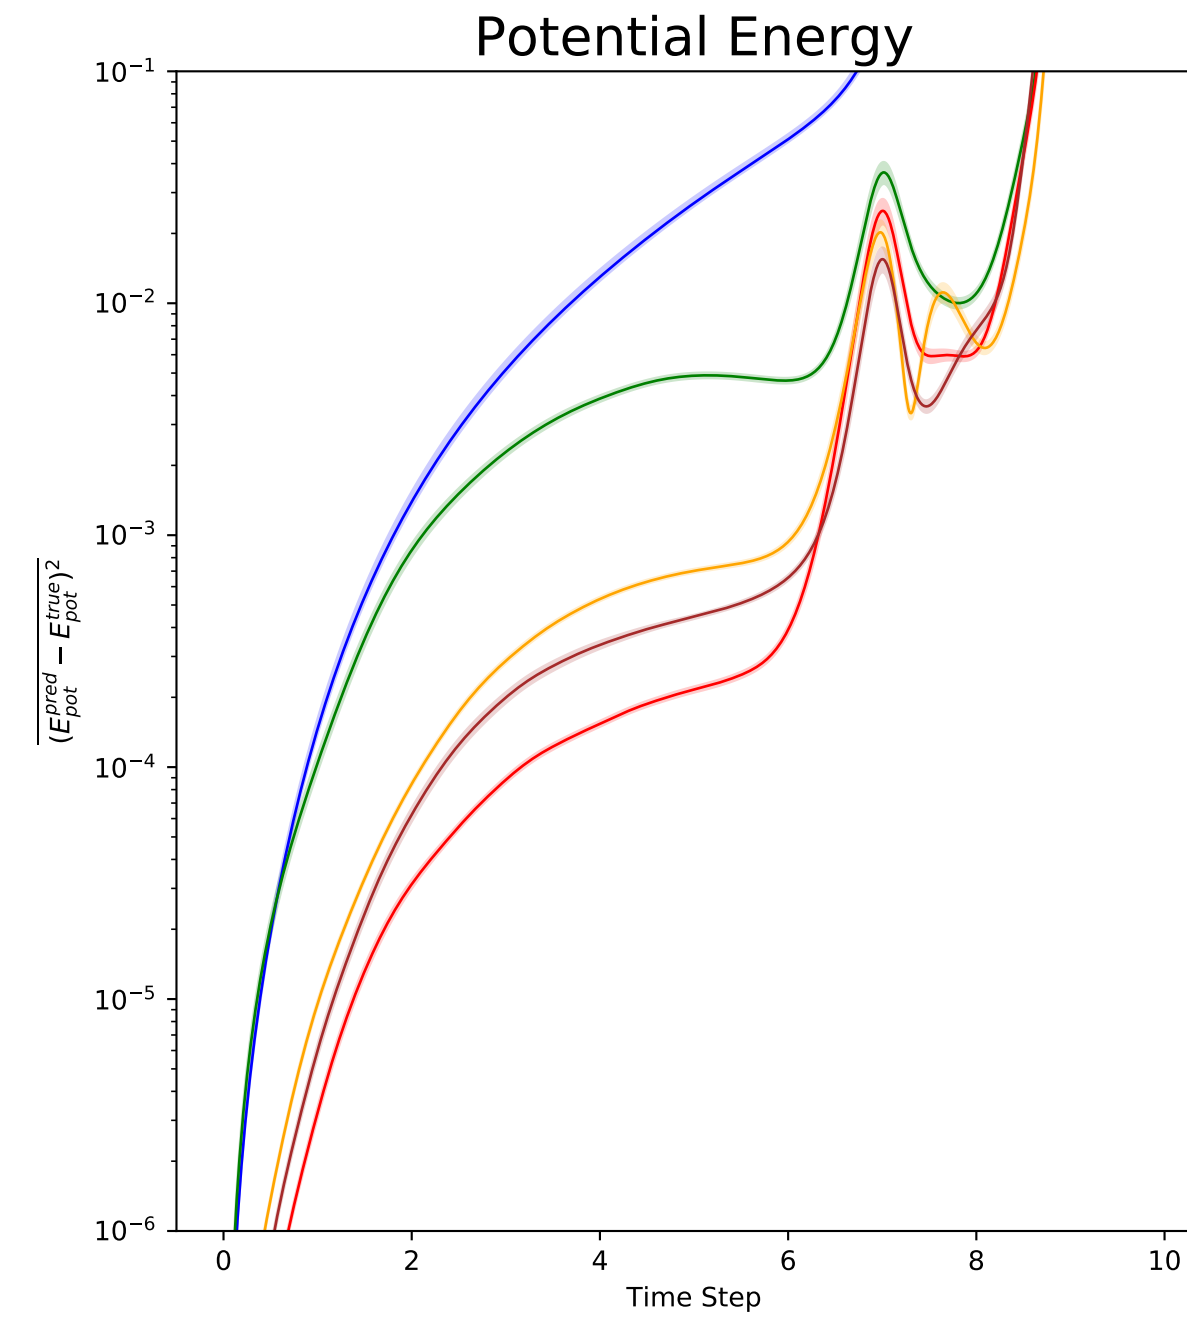

Supplement: supplementary_material [file attachment]
